# Supplementary material
Source: MDPI journal article supplement (https://www.mdpi.com/1424-2818/14/2/107)
Supplement: s1 [file s1]

**Table S1.** Chemical characteristics of soil from the plantation site located on the top of the Koniambo massif, New Caledonia.

|                           | Element               | Unit    | Quantity     |
|---------------------------|-----------------------|---------|--------------|
| Organic matter            | Carbon total          | %       | 0.10         |
|                           | Organic matter        | %       | 1.53         |
|                           | Organic carbon        | %       | 0.89         |
|                           | Total nitrogen        | ‰       | 0.43         |
|                           | C/N                   |         | 20.45        |
| Water content             | pF3                   | %       | 21.69        |
|                           | pF4,2                 | %       | 15.92        |
| pH-calcimetry             | pH (KCl)              |         | 6.24         |
|                           | pH (H <sub>2</sub> O) |         | 6.12         |
| Absorbent complex         | Ca                    | me/100g | 0.26         |
|                           | Mg                    | me/100g | 0.77         |
|                           | K                     | me/100g | 0.04         |
|                           | Na                    | me/100g | 0.13         |
|                           | Al                    | me/100g | <0.01        |
|                           | Mn                    | me/100g | 0.04         |
|                           | H                     | me/100g | <0.01        |
|                           | S (Ca, Mg, K, Na)     | me/100g | 1.23         |
|                           | CEC                   | me/100g | 1.79         |
|                           | TS                    | %       | 68.28        |
|                           | pH Co                 |         | 5.99         |
| Total element             | P                     | mg/kg   | 674.22       |
|                           | Fe                    | mg/kg   | 595833.33    |
|                           | Ni                    | mg/kg   | 6612.30      |
|                           | Mn                    | mg/kg   | 3203.75      |
|                           | Cr                    | mg/kg   | 20840.30     |
|                           | Co                    | mg/kg   | 439.33       |
|                           | Al                    | mg/kg   | 31441.67     |
|                           | Ca                    | mg/kg   | 288.38       |
|                           | Mg                    | mg/kg   | 4583.33      |
|                           | Ca/Mg                 |         | 0.06         |
|                           | K                     | mg/kg   | 159.43       |
|                           | Na                    | mg/kg   | 223.48       |
|                           | SiO <sub>2</sub>      | mg/kg   | 2.18         |
| Available elements (DTPA) | Fe                    | mg/kg   | 1.66         |
|                           | Cu                    | mg/kg   | 0.05         |
|                           | Zn                    | mg/kg   | 0.07         |
|                           | Mg                    | mg/kg   | 4.76         |
|                           | P                     | mg/kg   | 2 < LD (2.2) |

**Table S2.** Coordinates of the 9 *T. guillainii* sampled for the characterization of their associated ECM fungal partners.

| Tree reference | Coordinates                   | Altitude |
|----------------|-------------------------------|----------|
| Z1-A1          | 21°00'21.19"S; 164°50'20.00"E | 853 m    |
| Z1-A2          | 21°00'21.74"S; 164°50'20.17"E | 854 m    |
| Z1-A3          | 21°00'21.53"S; 164°50'19.63"E | 854 m    |
| Z2-A1          | 21°00'18.79"S; 164°50'20.35"E | 847 m    |
| Z2-A2          | 21°00'18.58"S; 164°50'19.82"E | 846 m    |
| Z2-A3          | 21°00'18.39"S; 164°50'19.61"E | 844 m    |
| Z3-A1          | 21°00'20.71"S; 164°50'16.46"E | 848 m    |
| Z3-A2          | 21°00'20.77"S; 164°50'15.62"E | 848 m    |
| Z3-A3          | 21°00'20.97"S; 164°50'15.98"E | 849 m    |

**Table S3.** Average plant growth and survival of *T. calobuxus* according to plantation plots and distance from the *A. spirorbis* canopy.

| Distance from the nurse plant |        | Growth                     |                               | % survival |
|-------------------------------|--------|----------------------------|-------------------------------|------------|
|                               |        | Plant height<br>(cm/month) | Collar diameter<br>(mm/month) |            |
| Circular plots                | 1 m    | 0.22 +/- 0.18              | 0.06 +/- 0.02                 | 100        |
|                               | 2 m    | 0.31 +/- 0.28              | 0.08 +/- 0.003                | 100        |
|                               | 3 m    | 0.24 +/- 0.14              | 0.07 +/- 0.01                 | 100        |
| Square plots                  | > 10 m | 1.14 +/- 0.62              | 0.22 +/- 0.09                 | 98.1       |

**Table S4:** Taxonomic and lineage identification of all OTUs according to UNITE database. Non-ectomycorrhizal lineages are not included in ECM community analyses.

| OTU number | Clone name | Lineage (UNITE)         | Phylum        | Subphylum       | Class           | Subclass                          | Order           | Family            | Genus              |
|------------|------------|-------------------------|---------------|-----------------|-----------------|-----------------------------------|-----------------|-------------------|--------------------|
| OTU_0      | KT-0       | /tomentella-thelephora  | Basidiomycota | Agaricomycotina | Agaricomycetes  | Agaricomycetes sbc Incertae sedis | Thelephorales   | Thelephoraceae    | <i>Tomentella</i>  |
| OTU_1      | KT-1       | /non-ectomycorrhizal    | Ascomycota    | Pezizomycotina  | Leotiomycetes   | Helotiales                        | Hyaloscyphaceae | Hyaloscyphaceae   | -                  |
| OTU_2      | KT-2       | /tomentella-thelephora  | Basidiomycota | Agaricomycotina | Agaricomycetes  | Agaricomycetes sbc Incertae sedis | Thelephorales   | Thelephoraceae    | -                  |
| OTU_3      | KT-3       | /non-ectomycorrhizal    | Ascomycota    | Pezizomycotina  | Leotiomycetes   | Leotiomycetidae                   | Helotiales      | -                 | -                  |
| OTU_4      | KT-4       | /russula-lactarius      | Basidiomycota | Agaricomycotina | Agaricomycetes  | Agaricomycetes sbc Incertae sedis | Russulales      | Russulaceae       | -                  |
| OTU_5      | KT-5       | /russula-lactarius      | Basidiomycota | Agaricomycotina | Agaricomycetes  | Agaricomycetes sbc Incertae sedis | Russulales      | Russulaceae       | -                  |
| OTU_6      | KT-6       | /non-ectomycorrhizal    | Ascomycota    | Pezizomycotina  | Leotiomycetes   | Leotiomycetidae                   | Helotiales      | -                 | -                  |
| OTU_7      | KT-7       | /clavulina              | Basidiomycota | Agaricomycotina | Agaricomycetes  | Agaricomycetes sbc Incertae sedis | Cantharellales  | -                 | -                  |
| OTU_8      | KT-8       | /tomentella-thelephora  | Basidiomycota | Agaricomycotina | Agaricomycetes  | Agaricomycetes sbc Incertae sedis | Thelephorales   | -                 | -                  |
| OTU_9      | KT-9       | /pisolithus-scleroderma | Basidiomycota | Agaricomycotina | Agaricomycetes  | Agaricomycetidae                  | Boetales        | Sclerodermataceae | <i>Scleroderma</i> |
| OTU_10     | KT-10      | /laccaria               | Basidiomycota | Agaricomycotina | Agaricomycetes  | Agaricomycetidae                  | Agaricales      | Hydnangiaceae     | -                  |
| OTU_12     | KT-12      | /non-ectomycorrhizal    | Ascomycota    | Pezizomycotina  | Leotiomycetes   | Leotiomycetidae                   | Helotiales      | -                 | -                  |
| OTU_13     | KT-13      | /pisolithus-scleroderma | Basidiomycota | Agaricomycotina | Agaricomycetes  | Agaricomycetidae                  | Boetales        | Sclerodermataceae | <i>Scleroderma</i> |
| OTU_14     | KT-14      | /boletus                | Basidiomycota | Agaricomycotina | Agaricomycetes  | Agaricomycetidae                  | Boetales        | Boletaceae        | -                  |
| OTU_15     | KT-15      | /russula-lactarius      | Basidiomycota | Agaricomycotina | Agaricomycetes  | Agaricomycetes sbc Incertae sedis | Russulales      | Russulaceae       | -                  |
| OTU_16     | KT-16      | /russula-lactarius      | Basidiomycota | Agaricomycotina | Agaricomycetes  | Agaricomycetes sbc Incertae sedis | Russulales      | Russulaceae       | -                  |
| OTU_17     | KT-17      | /tomentella-thelephora  | Basidiomycota | Agaricomycotina | Agaricomycetes  | Agaricomycetes sbc Incertae sedis | Thelephorales   | Thelephoraceae    | <i>Tomentella</i>  |
| OTU_19     | KT-19      | /sordariales2           | Ascomycota    | Pezizomycotina  | Sordariomycetes | Sordariomycetidae                 | -               | -                 | -                  |
| OTU_20     | KT-20      | /russula-lactarius      | Basidiomycota | Agaricomycotina | Agaricomycetes  | Agaricomycetes sbc Incertae sedis | Russulales      | Russulaceae       | -                  |
| OTU_21     | KT-21      | /tomentella-thelephora  | Basidiomycota | Agaricomycotina | Agaricomycetes  | Agaricomycetes sbc Incertae sedis | Thelephorales   | Thelephoraceae    | -                  |
| OTU_22     | KT-22      | /tomentella-thelephora  | Basidiomycota | Agaricomycotina | Agaricomycetes  | Agaricomycetes sbc Incertae sedis | Thelephorales   | -                 | -                  |
| OTU_23     | KT-23      | /russula-lactarius      | Basidiomycota | Agaricomycotina | Agaricomycetes  | Agaricomycetes sbc Incertae sedis | Russulales      | Russulaceae       | -                  |
| OTU_24     | KT-24      | /non-ectomycorrhizal    | Basidiomycota | Agaricomycotina | -               | -                                 | -               | -                 | -                  |
| OTU_25     | KT-25      | /tomentella-thelephora  | Basidiomycota | Agaricomycotina | Agaricomycetes  | Agaricomycetes sbc Incertae sedis | Thelephorales   | Thelephoraceae    | <i>Tomentella</i>  |
| OTU_26     | KT-26      | /russula-lactarius      | Basidiomycota | Agaricomycotina | Agaricomycetes  | Agaricomycetes sbc Incertae sedis | Russulales      | Russulaceae       | -                  |

|        |       |                        |               |                 |                 |                                   |                 |                  |                   |
|--------|-------|------------------------|---------------|-----------------|-----------------|-----------------------------------|-----------------|------------------|-------------------|
| OTU_28 | KT-28 | /tomentella-thelephora | Basidiomycota | Agaricomycotina | Agaricomycetes  | Agaricomycetes sbc Incertae sedis | Thelephorales   | Thelephoraceae   | <i>Tomentella</i> |
| OTU_29 | KT-29 | /non-ectomycorrhizal   | Ascomycota    | Pezizomycotina  | Leotiomycetes   | Leotiomycetidae                   | Helotiales      | -                | -                 |
| OTU_31 | KT-31 | /non-ectomycorrhizal   | Ascomycota    | Pezizomycotina  | Leotiomycetes   | Leotiomycetidae                   | Helotiales      | -                | -                 |
| OTU_32 | KT-32 | /inocybe               | Basidiomycota | Agaricomycotina | Agaricomycetes  | Agaricomycetidae                  | Agaricales      | Inocybaceae      | -                 |
| OTU_33 | KT-33 | /laccaria              | Basidiomycota | Agaricomycotina | Agaricomycetes  | Agaricomycetidae                  | Agaricales      | Hydnangiaceae    | -                 |
| OTU_34 | KT-34 | /non-ectomycorrhizal   | Ascomycota    | Pezizomycotina  | Leotiomycetes   | Leotiomycetidae                   | Helotiales      | -                | -                 |
| OTU_35 | KT-35 | /boletus               | Basidiomycota | Agaricomycotina | Agaricomycetes  | Agaricomycetidae                  | Boletales       | Boletaceae       | -                 |
| OTU_36 | KT-36 | /sordariales2          | Ascomycota    | Pezizomycotina  | Sordariomycetes | Sordariomycetidae                 | -               | -                | -                 |
| OTU_37 | KT-37 | /boletus               | Basidiomycota | Agaricomycotina | Agaricomycetes  | Agaricomycetidae                  | Boletales       | -                | -                 |
| OTU_38 | KT-38 | /russula-lactarius     | Basidiomycota | Agaricomycotina | Agaricomycetes  | Agaricomycetes sbc Incertae sedis | Russulales      | Russulaceae      | -                 |
| OTU_39 | KT-39 | /russula-lactarius     | Basidiomycota | Agaricomycotina | Agaricomycetes  | Agaricomycetes sbc Incertae sedis | Russulales      | Russulaceae      | -                 |
| OTU_40 | KT-40 | /clavulina             | Basidiomycota | Agaricomycotina | Agaricomycetes  | Agaricomycetes sbc Incertae sedis | Cantharellales  | -                | -                 |
| OTU_42 | KT-42 | /inocybe               | Basidiomycota | Agaricomycotina | Agaricomycetes  | Agaricomycetidae                  | Agaricales      | Inocybaceae      | <i>Inocybe</i>    |
| OTU_43 | KT-43 | /inocybe               | Basidiomycota | Agaricomycotina | Agaricomycetes  | Agaricomycetidae                  | Agaricales      | Inocybaceae      | <i>Inocybe</i>    |
| OTU_44 | KT-44 | /clavulina             | Basidiomycota | Agaricomycotina | Agaricomycetes  | Agaricomycetes sbc Incertae sedis | Cantharellales  | Clavulinaceae    | -                 |
| OTU_45 | KT-45 | /non-ectomycorrhizal   | Basidiomycota | Agaricomycotina | -               | -                                 | -               | -                | -                 |
| OTU_47 | KT-47 | /russula-lactarius     | Basidiomycota | Agaricomycotina | Agaricomycetes  | Agaricomycetes sbc Incertae sedis | Russulales      | Russulaceae      | -                 |
| OTU_48 | KT-48 | /tomentella-thelephora | Basidiomycota | Agaricomycotina | Agaricomycetes  | Agaricomycetes sbc Incertae sedis | Thelephorales   | Thelephoraceae   | -                 |
| OTU_50 | KT-50 | /inocybe               | Basidiomycota | Agaricomycotina | Agaricomycetes  | Agaricomycetidae                  | Agaricales      | Inocybaceae      | -                 |
| OTU_51 | KT-51 | /non-ectomycorrhizal   | Ascomycota    | Pezizomycotina  | Leotiomycetes   | Leotiomycetidae                   | Helotiales      | -                | -                 |
| OTU_52 | KT-52 | /sordariales2          | Ascomycota    | Pezizomycotina  | Sordariomycetes | Sordariomycetidae                 | -               | -                | -                 |
| OTU_53 | KT-53 | /tomentella-thelephora | Basidiomycota | Agaricomycotina | Agaricomycetes  | Agaricomycetes sbc Incertae sedis | Thelephorales   | -                | -                 |
| OTU_55 | KT-55 | /coltricia             | Basidiomycota | Agaricomycotina | Agaricomycetes  | Agaricomycetes sbc Incertae sedis | Hymenochaetales | Hymenochaetaceae | -                 |
| OTU_56 | KT-56 | /non-ectomycorrhizal   | Ascomycota    | Pezizomycotina  | Leotiomycetes   | Leotiomycetidae                   | Helotiales      | -                | -                 |
| OTU_57 | KT-57 | /tomentella-thelephora | Basidiomycota | Agaricomycotina | Agaricomycetes  | Agaricomycetes sbc Incertae sedis | Thelephorales   | Thelephoraceae   | <i>Tomentella</i> |
| OTU_58 | KT-58 | /inocybe               | Basidiomycota | Agaricomycotina | Agaricomycetes  | Agaricomycetidae                  | Agaricales      | Inocybaceae      | -                 |
| OTU_59 | KT-59 | /russula-lactarius     | Basidiomycota | Agaricomycotina | Agaricomycetes  | Agaricomycetes sbc Incertae sedis | Russulales      | Russulaceae      | -                 |
| OTU_60 | KT-60 | /tomentella-thelephora | Basidiomycota | Agaricomycotina | Agaricomycetes  | Agaricomycetes sbc Incertae sedis | Thelephorales   | Thelephoraceae   | -                 |
| OTU_61 | KT-61 | /tomentella-thelephora | Basidiomycota | Agaricomycotina | Agaricomycetes  | Agaricomycetes sbc Incertae sedis | Thelephorales   | Thelephoraceae   | <i>Tomentella</i> |

|        |       |                        |               |                 |                 |                                   |                   |                    |                     |
|--------|-------|------------------------|---------------|-----------------|-----------------|-----------------------------------|-------------------|--------------------|---------------------|
| OTU_62 | KT-62 | /inocybe               | Basidiomycota | Agaricomycotina | Agaricomycetes  | Agaricomycetidae                  | Agaricales        | Inocybaceae        | -                   |
| OTU_63 | KT-63 | /tomentella-thelephora | Basidiomycota | Agaricomycotina | Agaricomycetes  | Agaricomycetes sbc Incertae sedis | Thelephorales     | Thelephoraceae     | <i>Tomentella</i>   |
| OTU_65 | KT-65 | /tomentella-thelephora | Basidiomycota | Agaricomycotina | Agaricomycetes  | Agaricomycetes sbc Incertae sedis | Thelephorales     | Thelephoraceae     | <i>Tomentella</i>   |
| OTU_66 | KT-66 | /tomentella-thelephora | Basidiomycota | Agaricomycotina | Agaricomycetes  | Agaricomycetes sbc Incertae sedis | Thelephorales     | Thelephoraceae     | -                   |
| OTU_67 | KT-67 | /tomentella-thelephora | Basidiomycota | Agaricomycotina | Agaricomycetes  | Agaricomycetes sbc Incertae sedis | Thelephorales     | Thelephoraceae     | <i>Tomentella</i>   |
| OTU_68 | KT-68 | /russula-lactarius     | Basidiomycota | Agaricomycotina | Agaricomycetes  | Agaricomycetes sbc Incertae sedis | Russulales        | Russulaceae        | -                   |
| OTU_69 | KT-69 | /tomentella-thelephora | Basidiomycota | Agaricomycotina | Agaricomycetes  | Agaricomycetes sbc Incertae sedis | Thelephorales     | Thelephoraceae     | <i>Tomentella</i>   |
| OTU_70 | KT-70 | /tomentella-thelephora | Basidiomycota | Agaricomycotina | Agaricomycetes  | Agaricomycetes sbc Incertae sedis | Thelephorales     | Thelephoraceae     | -                   |
| OTU_71 | KT-71 | /tomentella-thelephora | Basidiomycota | Agaricomycotina | Agaricomycetes  | Agaricomycetes sbc Incertae sedis | Thelephorales     | Thelephoraceae     | -                   |
| OTU_72 | KT-72 | /sordariales2          | Ascomycota    | Pezizomycotina  | Sordariomycetes | Sordariomycetidae                 | -                 | -                  | -                   |
| OTU_73 | KT-73 | /tomentella-thelephora | Basidiomycota | Agaricomycotina | Agaricomycetes  | Agaricomycetes sbc Incertae sedis | Thelephorales     | -                  | -                   |
| OTU_74 | KT-74 | /tomentella-thelephora | Basidiomycota | Agaricomycotina | Agaricomycetes  | Agaricomycetes sbc Incertae sedis | Thelephorales     | Thelephoraceae     | -                   |
| OTU_75 | KT-75 | /tomentella-thelephora | Basidiomycota | Agaricomycotina | Agaricomycetes  | Agaricomycetes sbc Incertae sedis | Thelephorales     | Thelephoraceae     | -                   |
| OTU_76 | KT-76 | /sebacina              | Basidiomycota | Agaricomycotina | Agaricomycetes  | Agaricomycetes sbc Incertae sedis | Sebacinales       | Sebacinaceae       | -                   |
| OTU_77 | KT-77 | /russula-lactarius     | Basidiomycota | Agaricomycotina | Agaricomycetes  | Agaricomycetes sbc Incertae sedis | Russulales        | Russulaceae        | -                   |
| OTU_79 | KT-79 | /inocybe               | Basidiomycota | Agaricomycotina | Agaricomycetes  | Agaricomycetidae                  | Agaricales        | Inocybaceae        | -                   |
| OTU_81 | KT-81 | /non-ectomycorrhizal   | Ascomycota    | Pezizomycotina  | Sordariomycetes | Xylariomycetidae                  | -                 | -                  | -                   |
| OTU_82 | KT-82 | /inocybe               | Basidiomycota | Agaricomycotina | Agaricomycetes  | Agaricomycetidae                  | Agaricales        | Inocybaceae        | <i>Inocybe</i>      |
| OTU_84 | KT-84 | /non-ectomycorrhizal   | Ascomycota    | Pezizomycotina  | Sordariomycetes | Sordariomycetidae                 | Chaetosphaeriales | Chaetosphaeriaceae | <i>Codinaea</i>     |
| OTU_85 | KT-85 | /tomentella-thelephora | Basidiomycota | Agaricomycotina | Agaricomycetes  | Agaricomycetes sbc Incertae sedis | Thelephorales     | Thelephoraceae     | <i>Tomentella</i>   |
| OTU_87 | KT-87 | /russula-lactarius     | Basidiomycota | Agaricomycotina | Agaricomycetes  | Agaricomycetes sbc Incertae sedis | Russulales        | Russulaceae        | -                   |
| OTU_88 | KT-88 | /non-ectomycorrhizal   | Ascomycota    | Pezizomycotina  | Leotiomycetes   | Leotiomycetidae                   | Helotiales        | Myxotrichaceae     | <i>Oidiodendron</i> |
| OTU_89 | KT-89 | /non-ectomycorrhizal   | Basidiomycota | Agaricomycotina | Agaricomycetes  | Agaricomycetes sbc Incertae sedis | -                 | -                  | -                   |
| OTU_92 | KT-92 | /russula-lactarius     | Basidiomycota | Agaricomycotina | Agaricomycetes  | Agaricomycetes sbc Incertae sedis | Russulales        | Russulaceae        | -                   |
| OTU_93 | KT-93 | /tomentella-thelephora | Basidiomycota | Agaricomycotina | Agaricomycetes  | Agaricomycetes sbc Incertae sedis | Thelephorales     | Thelephoraceae     | <i>Tomentella</i>   |
| OTU_94 | KT-94 | /russula-lactarius     | Basidiomycota | Agaricomycotina | Agaricomycetes  | Agaricomycetes sbc Incertae sedis | Russulales        | Russulaceae        | <i>Russula</i>      |
| OTU_97 | KT-97 | /tomentella-thelephora | Basidiomycota | Agaricomycotina | Agaricomycetes  | Agaricomycetes sbc Incertae sedis | Thelephorales     | -                  | -                   |
| OTU_98 | KT-98 | /russula-lactarius     | Basidiomycota | Agaricomycotina | Agaricomycetes  | Agaricomycetes sbc Incertae sedis | Russulales        | Russulaceae        | -                   |
| OTU_99 | KT-99 | /tomentella-thelephora | Basidiomycota | Agaricomycotina | Agaricomycetes  | Agaricomycetes sbc Incertae sedis | Thelephorales     | Thelephoraceae     | <i>Tomentella</i>   |

|         |        |                        |               |                 |                |                                   |               |                |                    |
|---------|--------|------------------------|---------------|-----------------|----------------|-----------------------------------|---------------|----------------|--------------------|
| OTU_102 | KT-102 | /non-ectomycorrhizal   | Ascomycota    | Pezizomycotina  | Leotiomycetes  | Leotiomycetidae                   | Helotiales    | -              | -                  |
| OTU_103 | KT-103 | /non-ectomycorrhizal   | Ascomycota    | Pezizomycotina  | Leotiomycetes  | Leotiomycetidae                   | Helotiales    | -              | -                  |
| OTU_106 | KT-106 | /inocybe               | Basidiomycota | Agaricomycotina | Agaricomycetes | Agaricomycetidae                  | Agaricales    | Inocybaceae    | -                  |
| OTU_108 | KT-108 | /non-ectomycorrhizal   | Ascomycota    | Pezizomycotina  | Leotiomycetes  | Leotiomycetidae                   | Helotiales    | -              | -                  |
| OTU_109 | KT-109 | /non-ectomycorrhizal   | Ascomycota    | Pezizomycotina  | Leotiomycetes  | Leotiomycetidae                   | Helotiales    | -              | -                  |
| OTU_112 | KT-112 | /tomentella-thelephora | Basidiomycota | Agaricomycotina | Agaricomycetes | Agaricomycetes sbc Incertae sedis | Thelephorales | Thelephoraceae | <i>Tomentella</i>  |
| OTU_114 | KT-114 | /tomentella-thelephora | Basidiomycota | Agaricomycotina | Agaricomycetes | Agaricomycetes sbc Incertae sedis | Thelephorales | Thelephoraceae | -                  |
| OTU_115 | KT-115 | /non-ectomycorrhizal   | Ascomycota    | Pezizomycotina  | Leotiomycetes  | Leotiomycetidae                   | Helotiales    | -              | -                  |
| OTU_119 | KT-119 | /inocybe               | Basidiomycota | Agaricomycotina | Agaricomycetes | Agaricomycetidae                  | Agaricales    | Inocybaceae    | -                  |
| OTU_123 | KT-123 | /boletus               | Basidiomycota | Agaricomycotina | Agaricomycetes | Agaricomycetidae                  | Boetales      | Boletaceae     | <i>Caloboletus</i> |
| OTU_124 | KT-124 | /non-ectomycorrhizal   | Ascomycota    | Pezizomycotina  | Leotiomycetes  | Leotiomycetidae                   | Helotiales    | -              | -                  |
| OTU_125 | KT-125 | /russula-lactarius     | Basidiomycota | Agaricomycotina | Agaricomycetes | Agaricomycetes sbc Incertae sedis | Russulales    | Russulaceae    | -                  |
| OTU_127 | KT-127 | /non-ectomycorrhizal   | Ascomycota    | Pezizomycotina  | Leotiomycetes  | Leotiomycetidae                   | Helotiales    | -              | -                  |
| OTU_128 | KT-128 | /non-ectomycorrhizal   | Ascomycota    | Pezizomycotina  | Leotiomycetes  | Leotiomycetidae                   | Helotiales    | -              | -                  |

Table S5: Summary data of ITS sequences of ectomycorrhizal root tips deposited on DDBJ (<http://www.ddbj.nig.ac.jp/>).

| Sequence id. | OTU id. | Query length | Assigned DDBJ |                               | Assigned root tips information |                                |                                   | Taxonomic assignments         |            |            |               |                                            |
|--------------|---------|--------------|---------------|-------------------------------|--------------------------------|--------------------------------|-----------------------------------|-------------------------------|------------|------------|---------------|--------------------------------------------|
|              |         |              | Acc. N°       | entryID                       | Harvest day                    | Host species                   | Distance from <i>A. spirorbis</i> | Lineage                       | % identity | Acc. N°    | Origin        | Host species of the corresponding sequence |
| 1            | KT-0    | 698          | LC271284      | 59252486d25b2cee4700182e.KT-0 | 15/05/15                       | <i>Acacia spirorbis</i>        | 0 metres                          | <i>/tomentella-thelephora</i> | 98.80      | GU187871   | Australia     | -                                          |
| 2            | KT-0    | 690          | LC271284      | 59252486d25b2cee4700182e.KT-0 | 01/07/16                       | <i>Acacia spirorbis</i>        | 0 metres                          | <i>/tomentella-thelephora</i> | 99.00      | LC122153.1 | New Caledonia | <i>Acacia spirorbis</i>                    |
| 3            | KT-0    | 685          | LC271284      | 59252486d25b2cee4700182e.KT-0 | 01/07/16                       | <i>Tristaniopsis calobuxus</i> | 3 metres                          | <i>/tomentella-thelephora</i> | 99.00      | LC122155.1 | New Caledonia | <i>Acacia spirorbis</i>                    |
| 4            | KT-0    | 684          | LC271284      | 59252486d25b2cee4700182e.KT-0 | 01/07/16                       | <i>Tristaniopsis calobuxus</i> | 2 metres                          | <i>/tomentella-thelephora</i> | 100        | LC122153.1 | New Caledonia | <i>Acacia spirorbis</i>                    |
| 5            | KT-0    | 684          | LC271284      | 59252486d25b2cee4700182e.KT-0 | 01/07/16                       | <i>Tristaniopsis calobuxus</i> | 2 metres                          | <i>/tomentella-thelephora</i> | 99.00      | LC122155.1 | New Caledonia | <i>Acacia spirorbis</i>                    |
| 6            | KT-0    | 684          | LC271284      | 59252486d25b2cee4700182e.KT-0 | 01/07/16                       | <i>Tristaniopsis calobuxus</i> | 2 metres                          | <i>/tomentella-thelephora</i> | 99.00      | LC122155.1 | New Caledonia | <i>Acacia spirorbis</i>                    |
| 7            | KT-0    | 683          | LC271284      | 59252486d25b2cee4700182e.KT-0 | 15/05/15                       | <i>Acacia spirorbis</i>        | 0 metres                          | <i>/tomentella-thelephora</i> | 98.54      | UDB003341  | Australia     | -                                          |
| 8            | KT-0    | 683          | LC271284      | 59252486d25b2cee4700182e.KT-0 | 01/07/16                       | <i>Tristaniopsis calobuxus</i> | 2 metres                          | <i>/tomentella-thelephora</i> | 99.00      | LC122155.1 | New Caledonia | <i>Acacia spirorbis</i>                    |
| 9            | KT-0    | 683          | LC271284      | 59252486d25b2cee4700182e.KT-0 | 01/07/16                       | <i>Tristaniopsis calobuxus</i> | 2 metres                          | <i>/tomentella-thelephora</i> | 99.00      | LC122155.1 | New Caledonia | <i>Acacia spirorbis</i>                    |
| 10           | KT-0    | 681          | LC271284      | 59252486d25b2cee4700182e.KT-0 | 15/05/15                       | <i>Acacia spirorbis</i>        | 0 metres                          | <i>/tomentella-thelephora</i> | 97.24      | UDB003342  | Australia     | -                                          |
| 11           | KT-0    | 679          | LC271284      | 59252486d25b2cee4700182e.KT-0 | 15/05/15                       | <i>Acacia spirorbis</i>        | 0 metres                          | <i>/tomentella-thelephora</i> | 98.54      | UDB003341  | Australia     | -                                          |
| 12           | KT-0    | 679          | LC271284      | 59252486d25b2cee4700182e.KT-0 | 15/05/15                       | <i>Acacia spirorbis</i>        | 0 metres                          | <i>/tomentella-thelephora</i> | 98.54      | UDB003341  | Australia     | -                                          |
| 13           | KT-0    | 678          | LC271284      | 59252486d25b2cee4700182e.KT-0 | 15/05/15                       | <i>Acacia spirorbis</i>        | 0 metres                          | <i>/tomentella-thelephora</i> | 97.07      | UDB003342  | Australia     | -                                          |
| 14           | KT-0    | 678          | LC271284      | 59252486d25b2cee4700182e.KT-0 | 15/05/15                       | <i>Acacia spirorbis</i>        | 0 metres                          | <i>/tomentella-thelephora</i> | 98.54      | UDB003341  | Australia     | -                                          |
| 15           | KT-0    | 678          | LC271284      | 59252486d25b2cee4700182e.KT-0 | 15/05/15                       | <i>Acacia spirorbis</i>        | 0 metres                          | <i>/tomentella-thelephora</i> | 96.74      | UDB003342  | Australia     | -                                          |

|    |      |     |          |                               |          |                                |          |                        |       |            |               |                                     |
|----|------|-----|----------|-------------------------------|----------|--------------------------------|----------|------------------------|-------|------------|---------------|-------------------------------------|
| 16 | KT-0 | 677 | LC271284 | 59252486d25b2cee4700182e.KT-0 | 15/05/15 | <i>Acacia spirorbis</i>        | 0 metres | /tomentella-thelephora | 96.91 | UDB003342  | Australia     | -                                   |
| 17 | KT-0 | 677 | LC271284 | 59252486d25b2cee4700182e.KT-0 | 15/05/15 | <i>Acacia spirorbis</i>        | 0 metres | /tomentella-thelephora | 98.54 | UDB003341  | Australia     | -                                   |
| 18 | KT-0 | 676 | LC271284 | 59252486d25b2cee4700182e.KT-0 | 15/05/15 | <i>Acacia spirorbis</i>        | 0 metres | /tomentella-thelephora | 98.72 | UDB003341  | Australia     | -                                   |
| 19 | KT-0 | 676 | LC271284 | 59252486d25b2cee4700182e.KT-0 | 15/05/15 | <i>Acacia spirorbis</i>        | 0 metres | /tomentella-thelephora | 96.74 | UDB003342  | Australia     | -                                   |
| 20 | KT-0 | 671 | LC271284 | 59252486d25b2cee4700182e.KT-0 | 15/05/15 | <i>Acacia spirorbis</i>        | 0 metres | /tomentella-thelephora | 98.72 | UDB003341  | Australia     | -                                   |
| 21 | KT-0 | 651 | LC271284 | 59252486d25b2cee4700182e.KT-0 | 15/05/15 | <i>Acacia spirorbis</i>        | 0 metres | /tomentella-thelephora | 96.74 | UDB003342  | Australia     | -                                   |
| 22 | KT-0 | 633 | LC271284 | 59252486d25b2cee4700182e.KT-0 | 01/07/16 | <i>Tristaniopsis calobuxus</i> | 3 metres | /tomentella-thelephora | 99.00 | LC122153.1 | New Caledonia | <i>Acacia spirorbis</i>             |
| 23 | KT-0 | 585 | LC271284 | 59252486d25b2cee4700182e.KT-0 | 15/05/15 | <i>Tristaniopsis calobuxus</i> | -        | /tomentella-thelephora | 96.19 | UDB003342  | Australia     | -                                   |
| 24 | KT-0 | 584 | LC271284 | 59252486d25b2cee4700182e.KT-0 | 15/05/15 | <i>Tristaniopsis calobuxus</i> | -        | /tomentella-thelephora | 97.26 | UDB003342  | Australia     | -                                   |
| 25 | KT-0 | 556 | LC271284 | 59252486d25b2cee4700182e.KT-0 | 15/05/15 | <i>Tristaniopsis calobuxus</i> | -        | /tomentella-thelephora | 96.91 | UDB003342  | Australia     | -                                   |
| 26 | KT-1 | 505 | LC271285 | 59252486d25b2cee4700182e.KT-1 | 15/05/15 | <i>Tristaniopsis calobuxus</i> | -        | unknown HELOTIALES     | 98.02 | JX317264   | Brazil        | <i>Hoffmannseggella cinnabarina</i> |
| 27 | KT-1 | 504 | LC271285 | 59252486d25b2cee4700182e.KT-1 | 15/05/15 | <i>Tristaniopsis calobuxus</i> | -        | unknown HELOTIALES     | 98.37 | FJ197200   | USA           | -                                   |
| 28 | KT-1 | 498 | LC271285 | 59252486d25b2cee4700182e.KT-1 | 15/05/15 | <i>Tristaniopsis calobuxus</i> | -        | unknown HELOTIALES     | 99.38 | FJ197200   | USA           | -                                   |
| 29 | KT-1 | 496 | LC271285 | 59252486d25b2cee4700182e.KT-1 | 15/05/15 | <i>Tristaniopsis calobuxus</i> | -        | unknown HELOTIALES     | 99.59 | FJ197200   | USA           | -                                   |
| 30 | KT-2 | 691 | LC271286 | 59252486d25b2cee4700182e.KT-2 | 01/07/16 | <i>Acacia spirorbis</i>        | 0 metres | /tomentella-thelephora | 99.00 | LC122153.1 | New Caledonia | <i>Acacia spirorbis</i>             |
| 31 | KT-2 | 687 | LC271286 | 59252486d25b2cee4700182e.KT-2 | 01/07/16 | <i>Acacia spirorbis</i>        | 0 metres | /tomentella-thelephora | 99.00 | LC122153.1 | -             | -                                   |
| 32 | KT-2 | 686 | LC271286 | 59252486d25b2cee4700182e.KT-2 | 01/07/16 | <i>Acacia spirorbis</i>        | 0 metres | /tomentella-thelephora | 99.00 | LC122153.1 | New Caledonia | <i>Acacia spirorbis</i>             |
| 33 | KT-2 | 685 | LC271286 | 59252486d25b2cee4700182e.KT-2 | 01/07/16 | <i>Acacia spirorbis</i>        | 0 metres | /tomentella-thelephora | 90.00 | JX630720.1 | USA           | <i>Dryas integrifolia</i>           |
| 34 | KT-2 | 685 | LC271286 | 59252486d25b2cee4700182e.KT-2 | 01/07/16 | <i>Acacia spirorbis</i>        | 0 metres | /tomentella-thelephora | 90.00 | JX630720.1 | USA           | <i>Dryas integrifolia</i>           |
| 35 | KT-2 | 685 | LC271286 | 59252486d25b2cee4700182e.KT-2 | 01/07/16 | <i>Acacia spirorbis</i>        | 0 metres | /tomentella-thelephora | 100   | LC122153.1 | New Caledonia | <i>Acacia spirorbis</i>             |
| 36 | KT-2 | 685 | LC271286 | 59252486d25b2cee4700182e.KT-2 | 01/07/16 | <i>Acacia spirorbis</i>        | 0 metres | /tomentella-thelephora | 100   | LC122153.1 | New Caledonia | <i>Acacia spirorbis</i>             |
| 37 | KT-2 | 685 | LC271286 | 59252486d25b2cee4700182e.KT-2 | 01/07/16 | <i>Acacia spirorbis</i>        | 0 metres | /tomentella-thelephora | 99.00 | LC122153.1 | New Caledonia | <i>Acacia spirorbis</i>             |
| 38 | KT-2 | 684 | LC271286 | 59252486d25b2cee4700182e.KT-2 | 01/07/16 | <i>Acacia spirorbis</i>        | 0 metres | /tomentella-thelephora | 90.00 | KM403022.1 | Canada        | <i>Pseudotsuga menziesii</i>        |



|    |      |     |          |                               |          |                                |          |                        |       |            |               |                                     |
|----|------|-----|----------|-------------------------------|----------|--------------------------------|----------|------------------------|-------|------------|---------------|-------------------------------------|
| 39 | KT-2 | 684 | LC271286 | 59252486d25b2cee4700182e.KT-2 | 01/07/16 | <i>Acacia spirorbis</i>        | 0 metres | /tomentella-thelephora | 90.00 | KM403022.1 | Canada        | <i>Pseudotsuga menziesii</i>        |
| 40 | KT-2 | 684 | LC271286 | 59252486d25b2cee4700182e.KT-2 | 01/07/16 | <i>Acacia spirorbis</i>        | 0 metres | /tomentella-thelephora | 100   | LC122153.1 | New Caledonia | <i>Acacia spirorbis</i>             |
| 41 | KT-2 | 684 | LC271286 | 59252486d25b2cee4700182e.KT-2 | 01/07/16 | <i>Acacia spirorbis</i>        | 0 metres | /tomentella-thelephora | 100   | LC122153.1 | New Caledonia | <i>Acacia spirorbis</i>             |
| 42 | KT-2 | 684 | LC271286 | 59252486d25b2cee4700182e.KT-2 | 01/07/16 | <i>Tristaniopsis calobuxus</i> | 2 metres | /tomentella-thelephora | 99.00 | LC122155.1 | New Caledonia | <i>Acacia spirorbis</i>             |
| 43 | KT-2 | 683 | LC271286 | 59252486d25b2cee4700182e.KT-2 | 01/07/16 | <i>Acacia spirorbis</i>        | 0 metres | /tomentella-thelephora | 90.00 | KM403022.1 | Canada        | <i>Pseudotsuga menziesii</i>        |
| 44 | KT-2 | 683 | LC271286 | 59252486d25b2cee4700182e.KT-2 | 01/07/16 | <i>Acacia spirorbis</i>        | 0 metres | /tomentella-thelephora | 90.00 | KM403022.1 | Canada        | <i>Pseudotsuga menziesii</i>        |
| 45 | KT-2 | 683 | LC271286 | 59252486d25b2cee4700182e.KT-2 | 01/07/16 | <i>Tristaniopsis calobuxus</i> | 3 metres | /tomentella-thelephora | 99.00 | LC122155.1 | New Caledonia | <i>Acacia spirorbis</i>             |
| 46 | KT-2 | 683 | LC271286 | 59252486d25b2cee4700182e.KT-2 | 01/07/16 | <i>Tristaniopsis calobuxus</i> | 3 metres | /tomentella-thelephora | 99.00 | LC122155.1 | New Caledonia | <i>Acacia spirorbis</i>             |
| 47 | KT-2 | 682 | LC271286 | 59252486d25b2cee4700182e.KT-2 | 01/07/16 | <i>Acacia spirorbis</i>        | 0 metres | /tomentella-thelephora | 90.00 | KM403022.1 | Canada        | <i>Pseudotsuga menziesii</i>        |
| 48 | KT-2 | 682 | LC271286 | 59252486d25b2cee4700182e.KT-2 | 01/07/16 | <i>Acacia spirorbis</i>        | 0 metres | /tomentella-thelephora | 90.00 | KM403022.1 | Canada        | <i>Pseudotsuga menziesii</i>        |
| 49 | KT-2 | 682 | LC271286 | 59252486d25b2cee4700182e.KT-2 | 01/07/16 | <i>Tristaniopsis calobuxus</i> | 2 metres | /tomentella-thelephora | 90.00 | KM403022.1 | Canada        | <i>Pseudotsuga menziesii</i>        |
| 50 | KT-2 | 682 | LC271286 | 59252486d25b2cee4700182e.KT-2 | 01/07/16 | <i>Tristaniopsis calobuxus</i> | 2 metres | /tomentella-thelephora | 99.00 | LC122155.1 | New Caledonia | <i>Acacia spirorbis</i>             |
| 51 | KT-2 | 682 | LC271286 | 59252486d25b2cee4700182e.KT-2 | 01/07/16 | <i>Tristaniopsis calobuxus</i> | 2 metres | /tomentella-thelephora | 99.00 | LC122155.1 | New Caledonia | <i>Acacia spirorbis</i>             |
| 52 | KT-2 | 681 | LC271286 | 59252486d25b2cee4700182e.KT-2 | 01/07/16 | <i>Acacia spirorbis</i>        | 0 metres | /tomentella-thelephora | 89.00 | KM403022.1 | Canada        | <i>Pseudotsuga menziesii</i>        |
| 53 | KT-2 | 681 | LC271286 | 59252486d25b2cee4700182e.KT-2 | 01/07/16 | <i>Acacia spirorbis</i>        | 0 metres | /tomentella-thelephora | 90.00 | KM403022.1 | Canada        | <i>Pseudotsuga menziesii</i>        |
| 54 | KT-2 | 681 | LC271286 | 59252486d25b2cee4700182e.KT-2 | 01/07/16 | <i>Acacia spirorbis</i>        | 0 metres | /tomentella-thelephora | 100   | LC122153.1 | New Caledonia | <i>Acacia spirorbis</i>             |
| 55 | KT-2 | 680 | LC271286 | 59252486d25b2cee4700182e.KT-2 | 01/07/16 | <i>Acacia spirorbis</i>        | 0 metres | /tomentella-thelephora | 90.00 | KM403022.1 | Canada        | <i>Pseudotsuga menziesii</i>        |
| 56 | KT-2 | 680 | LC271286 | 59252486d25b2cee4700182e.KT-2 | 01/07/16 | <i>Tristaniopsis calobuxus</i> | 3 metres | /tomentella-thelephora | 90.00 | KM403022.1 | Canada        | <i>Pseudotsuga menziesii</i>        |
| 57 | KT-2 | 679 | LC271286 | 59252486d25b2cee4700182e.KT-2 | 01/07/16 | <i>Acacia spirorbis</i>        | 0 metres | /tomentella-thelephora | 90.00 | KM403022.1 | Canada        | <i>Pseudotsuga menziesii</i>        |
| 58 | KT-2 | 653 | LC271286 | 59252486d25b2cee4700182e.KT-2 | 01/07/16 | <i>Acacia spirorbis</i>        | 0 metres | /tomentella-thelephora | 90.00 | FJ554331.1 | Canada        | -                                   |
| 59 | KT-2 | 648 | LC271286 | 59252486d25b2cee4700182e.KT-2 | 01/07/16 | <i>Acacia spirorbis</i>        | 0 metres | /tomentella-thelephora | 90.00 | FJ554331.1 | Canada        | -                                   |
| 60 | KT-3 | 590 | LC271287 | 59252486d25b2cee4700182e.KT-3 | 15/05/15 | <i>Tristaniopsis calobuxus</i> | -        | unknown HELOTIALES     | 98.14 | JX317135   | Brazil        | <i>Hoffmannseggella cinnabarina</i> |
| 61 | KT-3 | 587 | LC271287 | 59252486d25b2cee4700182e.KT-3 | 15/05/15 | <i>Tristaniopsis calobuxus</i> | -        | unknown HELOTIALES     | 98.13 | JX317135   | Brazil        | <i>Hoffmannseggella cinnabarina</i> |

|    |      |     |          |                               |          |                                |   |                    |       |          |        |                                     |
|----|------|-----|----------|-------------------------------|----------|--------------------------------|---|--------------------|-------|----------|--------|-------------------------------------|
| 62 | KT-3 | 585 | LC271287 | 59252486d25b2cee4700182e.KT-3 | 15/05/15 | <i>Tristaniopsis calobuxus</i> | - | unknown HELOTIALES | 98.12 | JX317139 | Brazil | <i>Hoffmannseggella cinnabarina</i> |
| 63 | KT-3 | 584 | LC271287 | 59252486d25b2cee4700182e.KT-3 | 15/05/15 | <i>Tristaniopsis calobuxus</i> | - | unknown HELOTIALES | 97.61 | JX317135 | Brazil | <i>Hoffmannseggella cinnabarina</i> |
| 64 | KT-3 | 580 | LC271287 | 59252486d25b2cee4700182e.KT-3 | 15/05/15 | <i>Tristaniopsis calobuxus</i> | - | unknown HELOTIALES | 97.76 | JX317264 | Brazil | <i>Hoffmannseggella cinnabarina</i> |
| 65 | KT-3 | 578 | LC271287 | 59252486d25b2cee4700182e.KT-3 | 15/05/15 | <i>Tristaniopsis calobuxus</i> | - | unknown HELOTIALES | 97.75 | JX317139 | Brazil | <i>Hoffmannseggella cinnabarina</i> |
| 66 | KT-3 | 577 | LC271287 | 59252486d25b2cee4700182e.KT-3 | 15/05/15 | <i>Tristaniopsis calobuxus</i> | - | unknown HELOTIALES | 98.10 | JX317139 | Brazil | <i>Hoffmannseggella cinnabarina</i> |
| 67 | KT-3 | 575 | LC271287 | 59252486d25b2cee4700182e.KT-3 | 15/05/15 | <i>Tristaniopsis calobuxus</i> | - | unknown HELOTIALES | 97.92 | JX317139 | Brazil | <i>Hoffmannseggella cinnabarina</i> |
| 68 | KT-3 | 574 | LC271287 | 59252486d25b2cee4700182e.KT-3 | 15/05/15 | <i>Tristaniopsis calobuxus</i> | - | unknown HELOTIALES | 97.74 | JX317139 | Brazil | <i>Hoffmannseggella cinnabarina</i> |
| 69 | KT-3 | 574 | LC271287 | 59252486d25b2cee4700182e.KT-3 | 15/05/15 | <i>Tristaniopsis calobuxus</i> | - | unknown HELOTIALES | 97.91 | JX317139 | Brazil | <i>Hoffmannseggella cinnabarina</i> |
| 70 | KT-3 | 573 | LC271287 | 59252486d25b2cee4700182e.KT-3 | 15/05/15 | <i>Tristaniopsis calobuxus</i> | - | unknown HELOTIALES | 97.91 | JX317139 | Brazil | <i>Hoffmannseggella cinnabarina</i> |
| 71 | KT-3 | 508 | LC271287 | 59252486d25b2cee4700182e.KT-3 | 15/05/15 | <i>Tristaniopsis calobuxus</i> | - | unknown HELOTIALES | 97.64 | JX317139 | Brazil | <i>Hoffmannseggella cinnabarina</i> |
| 72 | KT-3 | 507 | LC271287 | 59252486d25b2cee4700182e.KT-3 | 15/05/15 | <i>Tristaniopsis calobuxus</i> | - | unknown HELOTIALES | 99.59 | FJ197200 | USA    | -                                   |
| 73 | KT-3 | 507 | LC271287 | 59252486d25b2cee4700182e.KT-3 | 15/05/15 | <i>Tristaniopsis calobuxus</i> | - | unknown HELOTIALES | 97.44 | JX317139 | Brazil | <i>Hoffmannseggella cinnabarina</i> |
| 74 | KT-3 | 506 | LC271287 | 59252486d25b2cee4700182e.KT-3 | 15/05/15 | <i>Tristaniopsis calobuxus</i> | - | unknown HELOTIALES | 97.63 | JX317139 | Brazil | <i>Hoffmannseggella cinnabarina</i> |
| 75 | KT-3 | 506 | LC271287 | 59252486d25b2cee4700182e.KT-3 | 15/05/15 | <i>Tristaniopsis calobuxus</i> | - | unknown HELOTIALES | 98.03 | JX317139 | Brazil | <i>Hoffmannseggella cinnabarina</i> |
| 76 | KT-3 | 503 | LC271287 | 59252486d25b2cee4700182e.KT-3 | 15/05/15 | <i>Tristaniopsis calobuxus</i> | - | unknown HELOTIALES | 99.59 | FJ197200 | USA    | -                                   |
| 77 | KT-3 | 499 | LC271287 | 59252486d25b2cee4700182e.KT-3 | 15/05/15 | <i>Tristaniopsis calobuxus</i> | - | unknown HELOTIALES | 99.59 | FJ197200 | USA    | -                                   |
| 78 | KT-3 | 498 | LC271287 | 59252486d25b2cee4700182e.KT-3 | 15/05/15 | <i>Tristaniopsis calobuxus</i> | - | unknown HELOTIALES | 97.80 | JX317139 | Brazil | <i>Hoffmannseggella cinnabarina</i> |
| 79 | KT-3 | 497 | LC271287 | 59252486d25b2cee4700182e.KT-3 | 15/05/15 | <i>Tristaniopsis calobuxus</i> | - | unknown HELOTIALES | 99.59 | FJ197200 | USA    | -                                   |
| 80 | KT-3 | 495 | LC271287 | 59252486d25b2cee4700182e.KT-3 | 15/05/15 | <i>Tristaniopsis calobuxus</i> | - | unknown HELOTIALES | 99.38 | FJ197200 | USA    | -                                   |
| 81 | KT-3 | 493 | LC271287 | 59252486d25b2cee4700182e.KT-3 | 15/05/15 | <i>Tristaniopsis calobuxus</i> | - | unknown HELOTIALES | 97.98 | JX317139 | Brazil | <i>Hoffmannseggella cinnabarina</i> |
| 82 | KT-3 | 492 | LC271287 | 59252486d25b2cee4700182e.KT-3 | 15/05/15 | <i>Tristaniopsis calobuxus</i> | - | unknown HELOTIALES | 99.18 | FJ197200 | USA    | -                                   |
| 83 | KT-3 | 490 | LC271287 | 59252486d25b2cee4700182e.KT-3 | 15/05/15 | <i>Tristaniopsis calobuxus</i> | - | unknown HELOTIALES | 99.59 | FJ197200 | USA    | -                                   |
| 84 | KT-3 | 453 | LC271287 | 59252486d25b2cee4700182e.KT-3 | 15/05/15 | <i>Tristaniopsis calobuxus</i> | - | unknown HELOTIALES | 99.54 | FJ197200 | USA    | -                                   |

|     |      |     |          |                               |          |                                 |             |                           |       |            |                 |                                     |
|-----|------|-----|----------|-------------------------------|----------|---------------------------------|-------------|---------------------------|-------|------------|-----------------|-------------------------------------|
| 85  | KT-3 | 416 | LC271287 | 59252486d25b2cee4700182e.KT-3 | 15/05/15 | <i>Tristaniopsis guillainii</i> | > 10 m      | unknown HELOTIALES        | 98.32 | JX317264   | Brazil          | <i>Hoffmannseggella cinnabarina</i> |
| 86  | KT-4 | 760 | LC271288 | 59252486d25b2cee4700182e.KT-4 | 15/05/15 | <i>Acacia spirorbis</i>         | 0 metres    | <i>/russula-lactarius</i> | 99.14 | KP012744   | Australia       | -                                   |
| 87  | KT-4 | 749 | LC271288 | 59252486d25b2cee4700182e.KT-4 | 15/05/15 | <i>Acacia spirorbis</i>         | 0 metres    | <i>/russula-lactarius</i> | 98.99 | KP012744   | Australia       | -                                   |
| 88  | KT-4 | 749 | LC271288 | 59252486d25b2cee4700182e.KT-4 | 15/05/15 | <i>Acacia spirorbis</i>         | 0 metres    | <i>/russula-lactarius</i> | 99.13 | KP012744   | Australia       | -                                   |
| 89  | KT-4 | 747 | LC271288 | 59252486d25b2cee4700182e.KT-4 | 15/05/15 | <i>Acacia spirorbis</i>         | 0 metres    | <i>/russula-lactarius</i> | 99.13 | KP012744   | Australia       | -                                   |
| 90  | KT-4 | 747 | LC271288 | 59252486d25b2cee4700182e.KT-4 | 01/07/16 | <i>Acacia spirorbis</i>         | 0 metres    | <i>/russula-lactarius</i> | 99.00 | LC122160.1 | -               | -                                   |
| 91  | KT-4 | 746 | LC271288 | 59252486d25b2cee4700182e.KT-4 | 15/05/15 | <i>Acacia spirorbis</i>         | 0 metres    | <i>/russula-lactarius</i> | 98.99 | KP012744   | Australia       | -                                   |
| 92  | KT-4 | 745 | LC271288 | 59252486d25b2cee4700182e.KT-4 | 15/05/15 | <i>Acacia spirorbis</i>         | 0 metres    | <i>/russula-lactarius</i> | 99.13 | KP012744   | Australia       | -                                   |
| 93  | KT-4 | 742 | LC271288 | 59252486d25b2cee4700182e.KT-4 | 15/05/15 | <i>Acacia spirorbis</i>         | 0 metres    | <i>/russula-lactarius</i> | 99.13 | KP012744   | Australia       | -                                   |
| 94  | KT-4 | 741 | LC271288 | 59252486d25b2cee4700182e.KT-4 | 15/05/15 | <i>Acacia spirorbis</i>         | 0 metres    | <i>/russula-lactarius</i> | 99.13 | KP012744   | Australia       | -                                   |
| 95  | KT-4 | 741 | LC271288 | 59252486d25b2cee4700182e.KT-4 | 15/05/15 | <i>Acacia spirorbis</i>         | 0 metres    | <i>/russula-lactarius</i> | 99.13 | KP012744   | Australia       | -                                   |
| 96  | KT-4 | 740 | LC271288 | 59252486d25b2cee4700182e.KT-4 | 15/05/15 | <i>Acacia spirorbis</i>         | 0 metres    | <i>/russula-lactarius</i> | 97.09 | KP012744   | Australia       | -                                   |
| 97  | KT-4 | 738 | LC271288 | 59252486d25b2cee4700182e.KT-4 | 15/05/15 | <i>Acacia spirorbis</i>         | 0 metres    | <i>/russula-lactarius</i> | 98.70 | KP012744   | Australia       | -                                   |
| 98  | KT-4 | 705 | LC271288 | 59252486d25b2cee4700182e.KT-4 | 01/07/16 | <i>Acacia spirorbis</i>         | 0 metres    | <i>/russula-lactarius</i> | 99.00 | LC122160.1 | -               | -                                   |
| 99  | KT-4 | 481 | LC271288 | 59252486d25b2cee4700182e.KT-4 | 01/07/16 | <i>Acacia spirorbis</i>         | 0 metres    | <i>/russula-lactarius</i> | 99.00 | LC122160.1 | New Caledonia   | <i>Acacia spirorbis</i>             |
| 100 | KT-5 | 728 | LC271289 | 59252486d25b2cee4700182e.KT-5 | 15/05/15 | <i>Acacia spirorbis</i>         | 0 metres    | unknown RUSSULALES        | 98.38 | JQ405662   | Mariana Islands | <i>Intsia bijuga</i>                |
| 101 | KT-5 | 722 | LC271289 | 59252486d25b2cee4700182e.KT-5 | 01/07/16 | <i>Tristaniopsis calobuxus</i>  | > 10 metres | unknown RUSSULALES        | 99.00 | JQ405662.1 | Mariana Islands | <i>Pisonia grandis</i>              |
| 102 | KT-5 | 721 | LC271289 | 59252486d25b2cee4700182e.KT-5 | 01/07/16 | <i>Tristaniopsis calobuxus</i>  | 1 metres    | unknown RUSSULALES        | 99.00 | JQ405662.1 | Mariana Islands | <i>Pisonia grandis</i>              |
| 103 | KT-5 | 721 | LC271289 | 59252486d25b2cee4700182e.KT-5 | 01/07/16 | <i>Tristaniopsis calobuxus</i>  | > 10 metres | unknown RUSSULALES        | 99.00 | JQ405662.1 | Mariana Islands | <i>Pisonia grandis</i>              |
| 104 | KT-5 | 720 | LC271289 | 59252486d25b2cee4700182e.KT-5 | 01/07/16 | <i>Tristaniopsis calobuxus</i>  | 1 metres    | unknown RUSSULALES        | 99.00 | JQ405662.1 | Mariana Islands | <i>Pisonia grandis</i>              |
| 105 | KT-5 | 720 | LC271289 | 59252486d25b2cee4700182e.KT-5 | 01/07/16 | <i>Tristaniopsis calobuxus</i>  | > 10 metres | unknown RUSSULALES        | 99.00 | JQ405662.1 | Mariana Islands | <i>Pisonia grandis</i>              |
| 106 | KT-5 | 719 | LC271289 | 59252486d25b2cee4700182e.KT-5 | 01/07/16 | <i>Tristaniopsis calobuxus</i>  | 2 metres    | unknown RUSSULALES        | 99.00 | JQ405662.1 | Mariana Islands | <i>Pisonia grandis</i>              |
| 107 | KT-5 | 719 | LC271289 | 59252486d25b2cee4700182e.KT-5 | 01/07/16 | <i>Tristaniopsis calobuxus</i>  | 2 metres    | unknown RUSSULALES        | 99.00 | JQ405662.1 | Mariana Islands | <i>Pisonia grandis</i>              |

|     |      |     |          |                               |          |                                |             |                    |       |            |                 |                                     |
|-----|------|-----|----------|-------------------------------|----------|--------------------------------|-------------|--------------------|-------|------------|-----------------|-------------------------------------|
| 108 | KT-5 | 718 | LC271289 | 59252486d25b2cee4700182e.KT-5 | 01/07/16 | <i>Tristaniopsis calobuxus</i> | 2 metres    | unknown RUSSULALES | 99.00 | JQ405662.1 | Mariana Islands | <i>Pisonia grandis</i>              |
| 109 | KT-5 | 716 | LC271289 | 59252486d25b2cee4700182e.KT-5 | 01/07/16 | <i>Tristaniopsis calobuxus</i> | 1 metres    | unknown RUSSULALES | 99.00 | JQ405662.1 | Mariana Islands | <i>Pisonia grandis</i>              |
| 110 | KT-5 | 714 | LC271289 | 59252486d25b2cee4700182e.KT-5 | 01/07/16 | <i>Tristaniopsis calobuxus</i> | > 10 metres | unknown RUSSULALES | 98.00 | JQ405662.1 | Mariana Islands | <i>Pisonia grandis</i>              |
| 111 | KT-5 | 712 | LC271289 | 59252486d25b2cee4700182e.KT-5 | 15/05/15 | <i>Acacia spirorbis</i>        | 0 metres    | unknown RUSSULALES | 99.10 | JQ405662   | Mariana Islands | <i>Intsia bijuga</i>                |
| 112 | KT-6 | 575 | LC271290 | 59252486d25b2cee4700182e.KT-6 | 15/05/15 | <i>Tristaniopsis calobuxus</i> | -           | unknown HELOTIALES | 98.09 | JX317139   | Brazil          | <i>Hoffmannseggella cinnabarina</i> |
| 113 | KT-6 | 574 | LC271290 | 59252486d25b2cee4700182e.KT-6 | 15/05/15 | <i>Tristaniopsis calobuxus</i> | -           | unknown HELOTIALES | 98.09 | JX317139   | Brazil          | <i>Hoffmannseggella cinnabarina</i> |
| 114 | KT-6 | 573 | LC271290 | 59252486d25b2cee4700182e.KT-6 | 15/05/15 | <i>Tristaniopsis calobuxus</i> | -           | unknown HELOTIALES | 98.08 | JX317139   | Brazil          | <i>Hoffmannseggella cinnabarina</i> |
| 115 | KT-6 | 547 | LC271290 | 59252486d25b2cee4700182e.KT-6 | 15/05/15 | <i>Tristaniopsis calobuxus</i> | -           | unknown HELOTIALES | 97.99 | JX317139   | Brazil          | <i>Hoffmannseggella cinnabarina</i> |
| 116 | KT-6 | 547 | LC271290 | 59252486d25b2cee4700182e.KT-6 | 15/05/15 | <i>Tristaniopsis calobuxus</i> | -           | unknown HELOTIALES | -     | -          | La Reunion      | -                                   |
| 117 | KT-6 | 543 | LC271290 | 59252486d25b2cee4700182e.KT-6 | 15/05/15 | <i>Tristaniopsis calobuxus</i> | -           | unknown HELOTIALES | -     | -          | La Reunion      | -                                   |
| 118 | KT-6 | 541 | LC271290 | 59252486d25b2cee4700182e.KT-6 | 15/05/15 | <i>Acacia spirorbis</i>        | 0 metres    | unknown HELOTIALES | -     | -          | La Reunion      | -                                   |
| 119 | KT-6 | 541 | LC271290 | 59252486d25b2cee4700182e.KT-6 | 15/05/15 | <i>Tristaniopsis calobuxus</i> | -           | unknown HELOTIALES | -     | -          | La Reunion      | -                                   |
| 120 | KT-6 | 540 | LC271290 | 59252486d25b2cee4700182e.KT-6 | 15/05/15 | <i>Tristaniopsis calobuxus</i> | -           | unknown HELOTIALES | -     | -          | La Reunion      | -                                   |
| 121 | KT-6 | 538 | LC271290 | 59252486d25b2cee4700182e.KT-6 | 15/05/15 | <i>Tristaniopsis calobuxus</i> | -           | unknown HELOTIALES | -     | -          | La Reunion      | -                                   |
| 122 | KT-6 | 517 | LC271290 | 59252486d25b2cee4700182e.KT-6 | 15/05/15 | <i>Tristaniopsis calobuxus</i> | -           | unknown HELOTIALES | 98.43 | AY627806   | Australia       | <i>Epacris pulchella</i>            |
| 123 | KT-6 | 515 | LC271290 | 59252486d25b2cee4700182e.KT-6 | 15/05/15 | <i>Tristaniopsis calobuxus</i> | -           | unknown HELOTIALES | 98.43 | AY627806   | Australia       | <i>Epacris pulchella</i>            |
| 124 | KT-6 | 509 | LC271290 | 59252486d25b2cee4700182e.KT-6 | 15/05/15 | <i>Tristaniopsis calobuxus</i> | -           | unknown HELOTIALES | -     | -          | La Reunion      | -                                   |
| 125 | KT-6 | 498 | LC271290 | 59252486d25b2cee4700182e.KT-6 | 15/05/15 | <i>Tristaniopsis calobuxus</i> | -           | unknown HELOTIALES | 99.59 | FJ197200   | USA             | -                                   |
| 126 | KT-6 | 493 | LC271290 | 59252486d25b2cee4700182e.KT-6 | 15/05/15 | <i>Tristaniopsis calobuxus</i> | -           | unknown HELOTIALES | 98.97 | FJ197200   | USA             | -                                   |
| 127 | KT-6 | 489 | LC271290 | 59252486d25b2cee4700182e.KT-6 | 15/05/15 | <i>Tristaniopsis calobuxus</i> | -           | unknown HELOTIALES | 99.17 | FJ197200   | USA             | -                                   |
| 128 | KT-6 | 484 | LC271290 | 59252486d25b2cee4700182e.KT-6 | 15/05/15 | <i>Tristaniopsis calobuxus</i> | -           | unknown HELOTIALES | 99.15 | FJ197200   | USA             | -                                   |
| 129 | KT-6 | 478 | LC271290 | 59252486d25b2cee4700182e.KT-6 | 15/05/15 | <i>Tristaniopsis calobuxus</i> | -           | unknown HELOTIALES | 99.16 | FR731633   | La Reunion      | <i>Eucalyptus grandis</i>           |
| 130 | KT-6 | 464 | LC271290 | 59252486d25b2cee4700182e.KT-6 | 15/05/15 | <i>Tristaniopsis calobuxus</i> | -           | unknown HELOTIALES | 98.92 | FJ197200   | USA             | -                                   |

|     |      |     |          |                               |          |                                |             |                         |       |            |               |                                     |
|-----|------|-----|----------|-------------------------------|----------|--------------------------------|-------------|-------------------------|-------|------------|---------------|-------------------------------------|
| 131 | KT-6 | 406 | LC271290 | 59252486d25b2cee4700182e.KT-6 | 15/05/15 | <i>Tristaniopsis calobuxus</i> | -           | unknown HELOTIALES      | -     | -          | La Reunion    | -                                   |
| 132 | KT-7 | 728 | LC271291 | 59252486d25b2cee4700182e.KT-7 | 01/07/16 | <i>Acacia spirorbis</i>        | 0 metres    | /clavulina              | 99.00 | LC122108.1 | New Caledonia | <i>Acacia spirorbis</i>             |
| 133 | KT-7 | 727 | LC271291 | 59252486d25b2cee4700182e.KT-7 | 01/07/16 | <i>Acacia spirorbis</i>        | 0 metres    | /clavulina              | 100   | LC122108.1 | New Caledonia | <i>Acacia spirorbis</i>             |
| 134 | KT-7 | 727 | LC271291 | 59252486d25b2cee4700182e.KT-7 | 01/07/16 | <i>Acacia spirorbis</i>        | 0 metres    | /clavulina              | 100   | LC122108.1 | New Caledonia | <i>Acacia spirorbis</i>             |
| 135 | KT-7 | 727 | LC271291 | 59252486d25b2cee4700182e.KT-7 | 01/07/16 | <i>Acacia spirorbis</i>        | 0 metres    | /clavulina              | 100   | LC122108.1 | New Caledonia | <i>Acacia spirorbis</i>             |
| 136 | KT-7 | 726 | LC271291 | 59252486d25b2cee4700182e.KT-7 | 01/07/16 | <i>Acacia spirorbis</i>        | 0 metres    | /clavulina              | 100   | LC122108.1 | New Caledonia | <i>Acacia spirorbis</i>             |
| 137 | KT-7 | 726 | LC271291 | 59252486d25b2cee4700182e.KT-7 | 01/07/16 | <i>Acacia spirorbis</i>        | 0 metres    | /clavulina              | 99.00 | LC122108.1 | New Caledonia | <i>Acacia spirorbis</i>             |
| 138 | KT-7 | 721 | LC271291 | 59252486d25b2cee4700182e.KT-7 | 15/05/15 | <i>Acacia spirorbis</i>        | 0 metres    | /clavulina              | 86.94 | UDB002700  | Australia     | -                                   |
| 139 | KT-7 | 717 | LC271291 | 59252486d25b2cee4700182e.KT-7 | 15/05/15 | <i>Acacia spirorbis</i>        | 0 metres    | /clavulina              | 86.51 | AF461565   | Australia     | -                                   |
| 140 | KT-8 | 694 | LC271292 | 59252486d25b2cee4700182e.KT-8 | 01/07/16 | <i>Acacia spirorbis</i>        | 0 metres    | /tomentella-thelephora  | 90.00 | EF218821.1 | Canada        | <i>Betula papyrifera</i>            |
| 141 | KT-8 | 693 | LC271292 | 59252486d25b2cee4700182e.KT-8 | 15/05/15 | <i>Acacia spirorbis</i>        | 0 metres    | /tomentella-thelephora  | 90.04 | JX630720   | USA           | <i>Dryas integrifolia</i>           |
| 142 | KT-8 | 685 | LC271292 | 59252486d25b2cee4700182e.KT-8 | 01/07/16 | <i>Tristaniopsis calobuxus</i> | 3 metres    | /tomentella-thelephora  | 90.00 | JX630720.1 | Brazil        | <i>Hoffmannseggella cinnabarina</i> |
| 143 | KT-8 | 684 | LC271292 | 59252486d25b2cee4700182e.KT-8 | 01/07/16 | <i>Acacia spirorbis</i>        | 0 metres    | /tomentella-thelephora  | 90.00 | KM403022.1 | Canada        | <i>Pseudotsuga menziesii</i>        |
| 144 | KT-8 | 684 | LC271292 | 59252486d25b2cee4700182e.KT-8 | 01/07/16 | <i>Acacia spirorbis</i>        | 0 metres    | /tomentella-thelephora  | 90.00 | KM403022.1 | Canada        | <i>Pseudotsuga menziesii</i>        |
| 145 | KT-8 | 681 | LC271292 | 59252486d25b2cee4700182e.KT-8 | 01/07/16 | <i>Acacia spirorbis</i>        | 0 metres    | /tomentella-thelephora  | 90.00 | KM403022.1 | Canada        | <i>Pseudotsuga menziesii</i>        |
| 146 | KT-8 | 681 | LC271292 | 59252486d25b2cee4700182e.KT-8 | 01/07/16 | <i>Acacia spirorbis</i>        | 0 metres    | /tomentella-thelephora  | 90.00 | KM403022.1 | Canada        | <i>Pseudotsuga menziesii</i>        |
| 147 | KT-8 | 678 | LC271292 | 59252486d25b2cee4700182e.KT-8 | 15/05/15 | <i>Acacia spirorbis</i>        | 0 metres    | /tomentella-thelephora  | 90.25 | JX630720   | USA           | <i>Dryas integrifolia</i>           |
| 148 | KT-8 | 672 | LC271292 | 59252486d25b2cee4700182e.KT-8 | 15/05/15 | <i>Acacia spirorbis</i>        | 0 metres    | /tomentella-thelephora  | 89.88 | JX630720   | USA           | <i>Dryas integrifolia</i>           |
| 149 | KT-9 | 698 | LC271293 | 59252486d25b2cee4700182e.KT-9 | 01/07/16 | <i>Tristaniopsis calobuxus</i> | 2 metres    | /pisolithus-scleroderma | 100   | LC122141.1 | New Caledonia | <i>Acacia spirorbis</i>             |
| 150 | KT-9 | 692 | LC271293 | 59252486d25b2cee4700182e.KT-9 | 01/07/16 | <i>Tristaniopsis calobuxus</i> | > 10 metres | /pisolithus-scleroderma | 100   | LC122141.1 | New Caledonia | <i>Acacia spirorbis</i>             |
| 151 | KT-9 | 692 | LC271293 | 59252486d25b2cee4700182e.KT-9 | 01/07/16 | <i>Tristaniopsis calobuxus</i> | > 10 metres | /pisolithus-scleroderma | 100   | LC122141.1 | New Caledonia | <i>Acacia spirorbis</i>             |
| 152 | KT-9 | 692 | LC271293 | 59252486d25b2cee4700182e.KT-9 | 01/07/16 | <i>Tristaniopsis calobuxus</i> | > 10 metres | /pisolithus-scleroderma | 100   | LC122141.1 | New Caledonia | <i>Acacia spirorbis</i>             |
| 153 | KT-9 | 691 | LC271293 | 59252486d25b2cee4700182e.KT-9 | 01/07/16 | <i>Tristaniopsis calobuxus</i> | 1 metres    | /pisolithus-scleroderma | 100   | LC122141.1 | New Caledonia | <i>Acacia spirorbis</i>             |



|     |       |     |          |                                |          |                                 |             |                                |       |            |               |                         |
|-----|-------|-----|----------|--------------------------------|----------|---------------------------------|-------------|--------------------------------|-------|------------|---------------|-------------------------|
| 154 | KT-9  | 471 | LC271293 | 59252486d25b2cee4700182e.KT-9  | 01/07/16 | <i>Tristaniopsis calobuxus</i>  | > 10 metres | <i>/pisolithus-scleroderma</i> | 99.00 | LC122215.1 | New Caledonia | <i>Acacia spirorbis</i> |
| 155 | KT-9  | 469 | LC271293 | 59252486d25b2cee4700182e.KT-9  | 01/07/16 | <i>Tristaniopsis calobuxus</i>  | > 10 metres | <i>/pisolithus-scleroderma</i> | 99.00 | LC122215.1 | New Caledonia | <i>Acacia spirorbis</i> |
| 156 | KT-10 | 696 | LC271294 | 59252486d25b2cee4700182e.KT-10 | 15/05/15 | <i>Tristaniopsis guillainii</i> | > 10 m      | <i>/laccaria</i>               | 90.76 | EU819478   | USA           | -                       |
| 157 | KT-10 | 676 | LC271294 | 59252486d25b2cee4700182e.KT-10 | 15/05/15 | <i>Tristaniopsis guillainii</i> | > 10 m      | <i>/laccaria</i>               | 93.87 | JX178632   | New Zealand   | -                       |
| 158 | KT-10 | 675 | LC271294 | 59252486d25b2cee4700182e.KT-10 | 15/05/15 | <i>Tristaniopsis guillainii</i> | > 10 m      | <i>/laccaria</i>               | 93.14 | JX178632   | New Zealand   | -                       |
| 159 | KT-10 | 652 | LC271294 | 59252486d25b2cee4700182e.KT-10 | 15/05/15 | <i>Tristaniopsis guillainii</i> | > 10 m      | <i>/laccaria</i>               | 92.20 | JX178632   | New Zealand   | -                       |
| 160 | KT-12 | 583 | LC271295 | 59252486d25b2cee4700182e.KT-12 | 15/05/15 | <i>Tristaniopsis guillainii</i> | > 10 m      | unknown HELOTIALES             | 94.05 | AY394892   | Canada        | -                       |
| 161 | KT-12 | 579 | LC271295 | 59252486d25b2cee4700182e.KT-12 | 15/05/15 | <i>Tristaniopsis guillainii</i> | > 10 m      | unknown HELOTIALES             | 94.01 | AY394892   | Canada        | -                       |
| 162 | KT-12 | 579 | LC271295 | 59252486d25b2cee4700182e.KT-12 | 15/05/15 | <i>Tristaniopsis guillainii</i> | > 10 m      | unknown HELOTIALES             | 94.01 | AY394892   | Canada        | -                       |
| 163 | KT-12 | 577 | LC271295 | 59252486d25b2cee4700182e.KT-12 | 15/05/15 | <i>Tristaniopsis guillainii</i> | > 10 m      | unknown HELOTIALES             | 93.64 | AY394892   | Canada        | -                       |
| 164 | KT-13 | 698 | LC271296 | 59252486d25b2cee4700182e.KT-13 | 15/05/15 | <i>Acacia spirorbis</i>         | 0 metres    | <i>/pisolithus-scleroderma</i> | 100   | KP191816   | New Zealand   | -                       |
| 165 | KT-13 | 693 | LC271296 | 59252486d25b2cee4700182e.KT-13 | 01/07/16 | <i>Tristaniopsis calobuxus</i>  | 1 metres    | <i>/pisolithus-scleroderma</i> | 99.00 | HM237174.1 | -             | -                       |
| 166 | KT-13 | 693 | LC271296 | 59252486d25b2cee4700182e.KT-13 | 01/07/16 | <i>Tristaniopsis calobuxus</i>  | 1 metres    | <i>/pisolithus-scleroderma</i> | 100   | KP191815.1 | New Zealand   | -                       |
| 167 | KT-8  | 692 | LC271292 | 59252486d25b2cee4700182e.KT-8  | 01/07/16 | <i>Tristaniopsis calobuxus</i>  | > 10 metres | <i>/tomentella-thelephora</i>  | 100   | LC122108.1 | New Caledonia | <i>Acacia spirorbis</i> |
| 168 | KT-13 | 692 | LC271296 | 59252486d25b2cee4700182e.KT-13 | 01/07/16 | <i>Tristaniopsis calobuxus</i>  | > 10 metres | <i>/pisolithus-scleroderma</i> | 100   | LC122141.1 | New Caledonia | <i>Acacia spirorbis</i> |
| 169 | KT-13 | 691 | LC271296 | 59252486d25b2cee4700182e.KT-13 | 01/07/16 | <i>Tristaniopsis calobuxus</i>  | 1 metres    | <i>/pisolithus-scleroderma</i> | 100   | LC122141.1 | New Caledonia | <i>Acacia spirorbis</i> |
| 170 | KT-13 | 690 | LC271296 | 59252486d25b2cee4700182e.KT-13 | 15/05/15 | <i>Acacia spirorbis</i>         | 0 metres    | <i>/pisolithus-scleroderma</i> | 99.42 | HM237174   | China         | -                       |
| 171 | KT-14 | 802 | LC271297 | 59252486d25b2cee4700182e.KT-14 | 01/07/16 | <i>Tristaniopsis calobuxus</i>  | > 10 metres | <i>/boletus</i>                | 87.00 | JQ003621.1 | Australia     | -                       |
| 172 | KT-14 | 688 | LC271297 | 59252486d25b2cee4700182e.KT-14 | 01/07/16 | <i>Tristaniopsis calobuxus</i>  | > 10 metres | <i>/boletus</i>                | 87.00 | JQ003652.1 | Australia     | -                       |
| 173 | KT-14 | 688 | LC271297 | 59252486d25b2cee4700182e.KT-14 | 01/07/16 | <i>Tristaniopsis calobuxus</i>  | > 10 metres | <i>/boletus</i>                | 87.00 | JQ003652.1 | Australia     | -                       |
| 174 | KT-14 | 683 | LC271297 | 59252486d25b2cee4700182e.KT-14 | 01/07/16 | <i>Tristaniopsis calobuxus</i>  | > 10 metres | <i>/boletus</i>                | 87.00 | JQ003652.1 | Australia     | -                       |
| 175 | KT-14 | 680 | LC271297 | 59252486d25b2cee4700182e.KT-14 | 01/07/16 | <i>Tristaniopsis calobuxus</i>  | > 10 metres | <i>/boletus</i>                | 86.00 | JQ003652.1 | Australia     | -                       |
| 176 | KT-14 | 679 | LC271297 | 59252486d25b2cee4700182e.KT-14 | 01/07/16 | <i>Tristaniopsis calobuxus</i>  | > 10 metres | <i>/boletus</i>                | 87.00 | JQ003652.1 | Australia     | -                       |

|     |       |     |          |                                |          |                                 |             |                               |       |            |                 |                                 |
|-----|-------|-----|----------|--------------------------------|----------|---------------------------------|-------------|-------------------------------|-------|------------|-----------------|---------------------------------|
| 177 | KT-15 | 728 | LC271298 | 59252486d25b2cee4700182e.KT-15 | 15/05/15 | <i>Tristaniopsis guillainii</i> | > 10 m      | <i>/russula-lactarius</i>     | 89.18 | DQ178936   | Australia       | <i>Dipodium hamiltonianum</i>   |
| 178 | KT-15 | 708 | LC271298 | 59252486d25b2cee4700182e.KT-15 | 15/05/15 | <i>Tristaniopsis guillainii</i> | > 10 m      | <i>/russula-lactarius</i>     | 85.08 | KT933974   | USA             | -                               |
| 179 | KT-15 | 707 | LC271298 | 59252486d25b2cee4700182e.KT-15 | 15/05/15 | <i>Tristaniopsis guillainii</i> | > 10 m      | <i>/russula-lactarius</i>     | 85.06 | KT933974   | USA             | -                               |
| 180 | KT-16 | 727 | LC271299 | 59252486d25b2cee4700182e.KT-16 | 15/05/15 | <i>Tristaniopsis guillainii</i> | > 10 m      | <i>/russula-lactarius</i>     | 89.86 | DQ178936   | Australia       | <i>Dipodium hamiltonianum</i>   |
| 181 | KT-16 | 715 | LC271299 | 59252486d25b2cee4700182e.KT-16 | 15/05/15 | <i>Tristaniopsis guillainii</i> | > 10 m      | <i>/russula-lactarius</i>     | 91.63 | DQ178936   | Australia       | <i>Dipodium hamiltonianum</i>   |
| 182 | KT-16 | 713 | LC271299 | 59252486d25b2cee4700182e.KT-16 | 15/05/15 | <i>Tristaniopsis guillainii</i> | > 10 m      | <i>/russula-lactarius</i>     | 84.76 | KT933974   | USA             | -                               |
| 183 | KT-17 | 685 | LC271300 | 59252486d25b2cee4700182e.KT-17 | 01/07/16 | <i>Acacia spirorbis</i>         | 0 metres    | <i>/tomentella-thelephora</i> | 98.00 | LC122232.1 | New Caledonia   | <i>Acacia spirorbis</i>         |
| 184 | KT-17 | 684 | LC271300 | 59252486d25b2cee4700182e.KT-17 | 01/07/16 | <i>Tristaniopsis calobuxus</i>  | > 10 metres | <i>/tomentella-thelephora</i> | 99.00 | LC122231.1 | New Caledonia   | <i>Acacia spirorbis</i>         |
| 185 | KT-17 | 683 | LC271300 | 59252486d25b2cee4700182e.KT-17 | 01/07/16 | <i>Acacia spirorbis</i>         | 0 metres    | <i>/tomentella-thelephora</i> | 99.00 | LC122232.1 | New Caledonia   | <i>Acacia spirorbis</i>         |
| 186 | KT-17 | 683 | LC271300 | 59252486d25b2cee4700182e.KT-17 | 01/07/16 | <i>Tristaniopsis calobuxus</i>  | > 10 metres | <i>/tomentella-thelephora</i> | 99.00 | LC122232.1 | New Caledonia   | <i>Acacia spirorbis</i>         |
| 187 | KT-17 | 681 | LC271300 | 59252486d25b2cee4700182e.KT-17 | 01/07/16 | <i>Acacia spirorbis</i>         | 0 metres    | <i>/tomentella-thelephora</i> | 99.00 | LC122232.1 | New Caledonia   | <i>Acacia spirorbis</i>         |
| 188 | KT-17 | 558 | LC271300 | 59252486d25b2cee4700182e.KT-17 | 15/05/15 | <i>Acacia spirorbis</i>         | 0 metres    | <i>/tomentella-thelephora</i> | 97.23 | UDB017783  | Seychelles      | -                               |
| 189 | KT-19 | 597 | LC271301 | 59252486d25b2cee4700182e.KT-19 | 01/07/16 | <i>Tristaniopsis calobuxus</i>  | 1 metres    | Unknown 1.                    | 98.00 | KJ209690.1 | La reunion      | <i>Eucalyptus camaldulensis</i> |
| 190 | KT-19 | 585 | LC271301 | 59252486d25b2cee4700182e.KT-19 | 01/07/16 | <i>Tristaniopsis calobuxus</i>  | 2 metres    | Unknown 1.                    | 99.00 | KJ209690.1 | La reunion      | <i>Eucalyptus camaldulensis</i> |
| 191 | KT-19 | 584 | LC271301 | 59252486d25b2cee4700182e.KT-19 | 01/07/16 | <i>Acacia spirorbis</i>         | 0 metres    | Unknown 1.                    | 99.00 | KJ209690.1 | Australia       | -                               |
| 192 | KT-19 | 543 | LC271301 | 59252486d25b2cee4700182e.KT-19 | 15/05/15 | <i>Tristaniopsis calobuxus</i>  | -           | Unknown 1.                    | -     | -          | La Reunion      | -                               |
| 193 | KT-19 | 543 | LC271301 | 59252486d25b2cee4700182e.KT-19 | 15/05/15 | <i>Tristaniopsis calobuxus</i>  | -           | Unknown 1.                    | -     | -          | La Reunion      | -                               |
| 194 | KT-19 | 533 | LC271301 | 59252486d25b2cee4700182e.KT-19 | 15/05/15 | <i>Tristaniopsis calobuxus</i>  | -           | Unknown 1.                    | 99.62 | KJ209690   | La Reunion      | <i>Eucalyptus camaldulensis</i> |
| 195 | KT-19 | 426 | LC271301 | 59252486d25b2cee4700182e.KT-19 | 15/05/15 | <i>Tristaniopsis calobuxus</i>  | -           | Unknown 1.                    | -     | -          | La Reunion      | -                               |
| 196 | KT-20 | 721 | LC271302 | 59252486d25b2cee4700182e.KT-20 | 01/07/16 | <i>Tristaniopsis calobuxus</i>  | 2 metres    | unknown RUSSULALES            | 99.00 | JQ405662.1 | Mariana Islands | <i>Pisonia grandis</i>          |
| 197 | KT-20 | 720 | LC271302 | 59252486d25b2cee4700182e.KT-20 | 01/07/16 | <i>Tristaniopsis calobuxus</i>  | > 10 metres | unknown RUSSULALES            | 98.00 | JQ405662.1 | Mariana Islands | <i>Pisonia grandis</i>          |
| 198 | KT-20 | 719 | LC271302 | 59252486d25b2cee4700182e.KT-20 | 01/07/16 | <i>Tristaniopsis calobuxus</i>  | 1 metres    | unknown RUSSULALES            | 99.00 | JQ405662.1 | Mariana Islands | <i>Pisonia grandis</i>          |
| 199 | KT-20 | 719 | LC271302 | 59252486d25b2cee4700182e.KT-20 | 01/07/16 | <i>Tristaniopsis calobuxus</i>  | 2 metres    | unknown RUSSULALES            | 99.00 | JQ405662.1 | Mariana Islands | <i>Pisonia grandis</i>          |

|     |       |     |          |                                |          |                                 |             |                               |       |            |                 |                                |
|-----|-------|-----|----------|--------------------------------|----------|---------------------------------|-------------|-------------------------------|-------|------------|-----------------|--------------------------------|
| 200 | KT-20 | 682 | LC271302 | 59252486d25b2cee4700182e.KT-20 | 01/07/16 | <i>Tristaniopsis calobuxus</i>  | > 10 metres | unknown RUSSULALES            | 99.00 | JQ405662.1 | Mariana Islands | <i>Pisonia grandis</i>         |
| 201 | KT-21 | 702 | LC271303 | 59252486d25b2cee4700182e.KT-21 | 15/05/15 | <i>Acacia spirorbis</i>         | 0 metres    | <i>/tomentella-thelephora</i> | 92.99 | AB854714   | Thailand        | -                              |
| 202 | KT-21 | 700 | LC271303 | 59252486d25b2cee4700182e.KT-21 | 15/05/15 | <i>Acacia spirorbis</i>         | 0 metres    | <i>/tomentella-thelephora</i> | 93.27 | AB854714   | Thailand        | -                              |
| 203 | KT-21 | 687 | LC271303 | 59252486d25b2cee4700182e.KT-21 | 15/05/15 | <i>Acacia spirorbis</i>         | 0 metres    | <i>/tomentella-thelephora</i> | 93.12 | AB854714   | Thailand        | -                              |
| 204 | KT-21 | 683 | LC271303 | 59252486d25b2cee4700182e.KT-21 | 15/05/15 | <i>Acacia spirorbis</i>         | 0 metres    | <i>/tomentella-thelephora</i> | 93.12 | AB854714   | Thailand        | -                              |
| 205 | KT-21 | 572 | LC271303 | 59252486d25b2cee4700182e.KT-21 | 15/05/15 | <i>Acacia spirorbis</i>         | 0 metres    | <i>/tomentella-thelephora</i> | 93.44 | UDB023404  | Thailand        | -                              |
| 206 | KT-22 | 695 | LC271304 | 59252486d25b2cee4700182e.KT-22 | 15/05/15 | <i>Acacia spirorbis</i>         | 0 metres    | <i>/tomentella-thelephora</i> | 88.98 | FN396400   | Seychelles      | <i>Vateriopsis sechellarum</i> |
| 207 | KT-23 | 694 | LC271305 | 59252486d25b2cee4700182e.KT-23 | 01/07/16 | <i>Acacia spirorbis</i>         | 0 metres    | <i>/russula-lactarius</i>     | 93.00 | GQ219916.1 | Germany         | -                              |
| 208 | KT-23 | 689 | LC271305 | 59252486d25b2cee4700182e.KT-23 | 15/05/15 | <i>Acacia spirorbis</i>         | 0 metres    | <i>/russula-lactarius</i>     | 93.02 | HM240161   | USA             | -                              |
| 209 | KT-23 | 687 | LC271305 | 59252486d25b2cee4700182e.KT-23 | 15/05/15 | <i>Acacia spirorbis</i>         | 0 metres    | <i>/russula-lactarius</i>     | 93.00 | HM240161   | USA             | -                              |
| 210 | KT-23 | 687 | LC271305 | 59252486d25b2cee4700182e.KT-23 | 15/05/15 | <i>Acacia spirorbis</i>         | 0 metres    | <i>/russula-lactarius</i>     | 93.00 | HM240161   | USA             | -                              |
| 211 | KT-24 | 687 | LC271306 | 59252486d25b2cee4700182e.KT-24 | 01/07/16 | <i>Tristaniopsis calobuxus</i>  | 1 metres    | Unknown 2.                    | 99.00 | DQ420876.1 | USA             | -                              |
| 212 | KT-24 | 686 | LC271306 | 59252486d25b2cee4700182e.KT-24 | 01/07/16 | <i>Tristaniopsis calobuxus</i>  | 1 metres    | Unknown 2.                    | 99.00 | DQ420876.1 | USA             | -                              |
| 213 | KT-25 | 686 | LC271307 | 59252486d25b2cee4700182e.KT-25 | 01/07/16 | <i>Tristaniopsis calobuxus</i>  | > 10 metres | <i>/tomentella-thelephora</i> | 99.00 | LC122232.1 | New Caledonia   | <i>Acacia spirorbis</i>        |
| 214 | KT-25 | 684 | LC271307 | 59252486d25b2cee4700182e.KT-25 | 01/07/16 | <i>Acacia spirorbis</i>         | 0 metres    | <i>/tomentella-thelephora</i> | 99.00 | LC122232.1 | New Caledonia   | <i>Acacia spirorbis</i>        |
| 215 | KT-25 | 682 | LC271307 | 59252486d25b2cee4700182e.KT-25 | 01/07/16 | <i>Tristaniopsis calobuxus</i>  | > 10 metres | <i>/tomentella-thelephora</i> | 99.00 | LC122232.1 | New Caledonia   | <i>Acacia spirorbis</i>        |
| 216 | KT-25 | 551 | LC271307 | 59252486d25b2cee4700182e.KT-25 | 01/07/16 | <i>Tristaniopsis calobuxus</i>  | 1 metres    | <i>/tomentella-thelephora</i> | 99.00 | LC122232.1 | New Caledonia   | <i>Acacia spirorbis</i>        |
| 217 | KT-26 | 673 | LC271308 | 59252486d25b2cee4700182e.KT-26 | 15/05/15 | <i>Tristaniopsis guillainii</i> | > 10 m      | unknown RUSSULALES            | 94.02 | HQ318283   | Australia       | -                              |
| 218 | KT-26 | 625 | LC271308 | 59252486d25b2cee4700182e.KT-26 | 15/05/15 | <i>Tristaniopsis guillainii</i> | > 10 m      | unknown RUSSULALES            | 93.62 | HQ318283   | Australia       | -                              |
| 219 | KT-28 | 608 | LC271309 | 59252486d25b2cee4700182e.KT-28 | 15/05/15 | <i>Acacia spirorbis</i>         | 0 metres    | <i>/tomentella-thelephora</i> | 95.56 | UDB017783  | Seychelles      | -                              |
| 220 | KT-28 | 570 | LC271309 | 59252486d25b2cee4700182e.KT-28 | 15/05/15 | <i>Acacia spirorbis</i>         | 0 metres    | <i>/tomentella-thelephora</i> | 96.32 | UDB017783  | Seychelles      | -                              |
| 221 | KT-28 | 531 | LC271309 | 59252486d25b2cee4700182e.KT-28 | 15/05/15 | <i>Acacia spirorbis</i>         | 0 metres    | <i>/tomentella-thelephora</i> | 96.42 | UDB017783  | Seychelles      | -                              |
| 222 | KT-28 | 529 | LC271309 | 59252486d25b2cee4700182e.KT-28 | 15/05/15 | <i>Acacia spirorbis</i>         | 0 metres    | <i>/tomentella-thelephora</i> | 94.90 | UDB017783  | Seychelles      | -                              |



|     |       |     |          |                                |          |                                 |             |                               |       |            |               |                                     |
|-----|-------|-----|----------|--------------------------------|----------|---------------------------------|-------------|-------------------------------|-------|------------|---------------|-------------------------------------|
| 223 | KT-29 | 593 | LC271310 | 59252486d25b2cee4700182e.KT-29 | 15/05/15 | <i>Tristaniopsis guillainii</i> | > 10 m      | unknown HELOTIALES            | 98.48 | JX317264   | Brazil        | <i>Hoffmannseggella cinnabarina</i> |
| 224 | KT-29 | 592 | LC271310 | 59252486d25b2cee4700182e.KT-29 | 01/07/16 | <i>Tristaniopsis calobuxus</i>  | > 10 metres | unknown HELOTIALES            | 98.00 | JX317118.1 | Brazil        | <i>Hoffmannseggella cinnabarina</i> |
| 225 | KT-29 | 585 | LC271310 | 59252486d25b2cee4700182e.KT-29 | 15/05/15 | <i>Acacia spirorbis</i>         | 0 metres    | unknown HELOTIALES            | 97.61 | JX317264   | Brazil        | <i>Hoffmannseggella cinnabarina</i> |
| 226 | KT-31 | 506 | LC271311 | 59252486d25b2cee4700182e.KT-31 | 15/05/15 | <i>Tristaniopsis calobuxus</i>  | -           | <i>/tomentella-thelephora</i> | 98.97 | FJ197200   | USA           | -                                   |
| 227 | KT-31 | 404 | LC271311 | 59252486d25b2cee4700182e.KT-31 | 01/07/16 | <i>Acacia spirorbis</i>         | 0 metres    | <i>/tomentella-thelephora</i> | 99.00 | LC122169.1 | New Caledonia | <i>Acacia spirorbis</i>             |
| 228 | KT-32 | 698 | LC271312 | 59252486d25b2cee4700182e.KT-32 | 15/05/15 | <i>Acacia spirorbis</i>         | 0 metres    | <i>/inocybe</i>               | 96.09 | KP013044   | Australia     | -                                   |
| 229 | KT-32 | 689 | LC271312 | 59252486d25b2cee4700182e.KT-32 | 01/07/16 | <i>Acacia spirorbis</i>         | 0 metres    | <i>/inocybe</i>               | 99.00 | KP013044.1 | Australia     | -                                   |
| 230 | KT-32 | 683 | LC271312 | 59252486d25b2cee4700182e.KT-32 | 15/05/15 | <i>Acacia spirorbis</i>         | 0 metres    | <i>/inocybe</i>               | 98.91 | KP013048   | Australia     | -                                   |
| 231 | KT-33 | 678 | LC271313 | 59252486d25b2cee4700182e.KT-33 | 15/05/15 | <i>Tristaniopsis guillainii</i> | > 10 m      | <i>/laccaria</i>              | 93.57 | JX178632   | New Zealand   | -                                   |
| 232 | KT-33 | 604 | LC271313 | 59252486d25b2cee4700182e.KT-33 | 15/05/15 | <i>Tristaniopsis guillainii</i> | > 10 m      | <i>/laccaria</i>              | 90.97 | UDB004086  | Australia     | -                                   |
| 233 | KT-34 | 581 | LC271314 | 59252486d25b2cee4700182e.KT-34 | 01/07/16 | <i>Tristaniopsis calobuxus</i>  | 3 metres    | unknown HELOTIALES            | 97.00 | JX317139.1 | Brazil        | <i>Hoffmannseggella cinnabarina</i> |
| 234 | KT-34 | 537 | LC271314 | 59252486d25b2cee4700182e.KT-34 | 01/07/16 | <i>Tristaniopsis calobuxus</i>  | > 10 metres | unknown HELOTIALES            | 98.00 | JX317139.1 | Brazil        | <i>Hoffmannseggella cinnabarina</i> |
| 235 | KT-34 | 487 | LC271314 | 59252486d25b2cee4700182e.KT-34 | 15/05/15 | <i>Tristaniopsis calobuxus</i>  | -           | unknown HELOTIALES            | 98.31 | FJ197200   | USA           | -                                   |
| 236 | KT-35 | 806 | LC271315 | 59252486d25b2cee4700182e.KT-35 | 01/07/16 | <i>Tristaniopsis calobuxus</i>  | > 10 metres | <i>/boletus</i>               | 88.00 | JQ003621.1 | Australia     | -                                   |
| 237 | KT-35 | 763 | LC271315 | 59252486d25b2cee4700182e.KT-35 | 01/07/16 | <i>Tristaniopsis calobuxus</i>  | > 10 metres | <i>/boletus</i>               | 87.00 | JQ003621.1 | Australia     | -                                   |
| 238 | KT-36 | 543 | LC271316 | 59252486d25b2cee4700182e.KT-36 | 15/05/15 | <i>Tristaniopsis calobuxus</i>  | -           | Other unknown                 | 99.45 | KJ209690   | La Reunion    | <i>Eucalyptus camaldulensis</i>     |
| 239 | KT-37 | 766 | LC271317 | 59252486d25b2cee4700182e.KT-37 | 15/05/15 | <i>Tristaniopsis guillainii</i> | > 10 m      | <i>/boletus</i>               | 87.28 | KJ729488   | Italy         | -                                   |
| 240 | KT-38 | 744 | LC271318 | 59252486d25b2cee4700182e.KT-38 | 15/05/15 | <i>Acacia spirorbis</i>         | 0 metres    | <i>/russula-lactarius</i>     | 97.67 | KP012820   | Australia     | -                                   |
| 241 | KT-38 | 743 | LC271318 | 59252486d25b2cee4700182e.KT-38 | 01/07/16 | <i>Acacia spirorbis</i>         | 0 metres    | <i>/russula-lactarius</i>     | 100   | LC122160.1 | New Caledonia | <i>Acacia spirorbis</i>             |
| 242 | KT-39 | 738 | LC271319 | 59252486d25b2cee4700182e.KT-39 | 15/05/15 | <i>Tristaniopsis guillainii</i> | > 10 m      | Other unknown                 | 89.59 | DQ178936   | Australia     | <i>Dipodium hamiltonianum</i>       |
| 243 | KT-40 | 730 | LC271320 | 59252486d25b2cee4700182e.KT-40 | 01/07/16 | <i>Acacia spirorbis</i>         | 0 metres    | <i>/clavulina</i>             | 100   | LC122108.1 | -             | -                                   |
| 244 | KT-40 | 645 | LC271320 | 59252486d25b2cee4700182e.KT-40 | 15/05/15 | <i>Acacia spirorbis</i>         | 0 metres    | <i>/clavulina</i>             | 86.57 | UDB002700  | Australia     | -                                   |
| 245 | KT-42 | 703 | LC271321 | 59252486d25b2cee4700182e.KT-42 | 01/07/16 | <i>Acacia spirorbis</i>         | 0 metres    | <i>/inocybe</i>               | 99.00 | KJ756489.1 | Australia     | -                                   |

|     |       |     |          |                                |          |                                 |             |                        |       |            |                 |                                     |
|-----|-------|-----|----------|--------------------------------|----------|---------------------------------|-------------|------------------------|-------|------------|-----------------|-------------------------------------|
| 246 | KT-42 | 701 | LC271321 | 59252486d25b2cee4700182e.KT-42 | 01/07/16 | <i>Acacia spirorbis</i>         | 0 metres    | /inocybe               | 99.00 | KJ756489.1 | Australia       | -                                   |
| 247 | KT-43 | 700 | LC271322 | 59252486d25b2cee4700182e.KT-43 | 01/07/16 | <i>Acacia spirorbis</i>         | 0 metres    | /inocybe               | 98.00 | KJ756489.1 | Australia       | -                                   |
| 248 | KT-43 | 700 | LC271322 | 59252486d25b2cee4700182e.KT-43 | 01/07/16 | <i>Acacia spirorbis</i>         | 0 metres    | /inocybe               | 99.00 | KJ756489.1 | Australia       | -                                   |
| 249 | KT-44 | 689 | LC271323 | 59252486d25b2cee4700182e.KT-44 | 15/05/15 | <i>Tristaniopsis guillainii</i> | > 10 m      | /clavulina             | 83.91 | UDB014184  | Viet Nam        | -                                   |
| 250 | KT-45 | 688 | LC271324 | 59252486d25b2cee4700182e.KT-45 | 01/07/16 | <i>Acacia spirorbis</i>         | 0 metres    | Unknown 2.             | 99.00 | DQ420876.1 | USA             | -                                   |
| 251 | KT-45 | 686 | LC271324 | 59252486d25b2cee4700182e.KT-45 | 01/07/16 | <i>Tristaniopsis calobuxus</i>  | 1 metres    | Unknown 2.             | 99.00 | DQ420876.1 | USA             | -                                   |
| 252 | KT-47 | 651 | LC271325 | 59252486d25b2cee4700182e.KT-47 | 15/05/15 | <i>Tristaniopsis guillainii</i> | > 10 m      | unknown RUSSULALES     | 88.67 | HQ318283   | Australia       | -                                   |
| 253 | KT-48 | 642 | LC271326 | 59252486d25b2cee4700182e.KT-48 | 01/07/16 | <i>Acacia spirorbis</i>         | 0 metres    | /tomentella-thelephora | 99.00 | LC122232.1 | New Caledonia   | <i>Acacia spirorbis</i>             |
| 254 | KT-48 | 549 | LC271326 | 59252486d25b2cee4700182e.KT-48 | 01/07/16 | <i>Acacia spirorbis</i>         | 0 metres    | /tomentella-thelephora | 99.00 | LC122232.1 | -               | -                                   |
| 255 | KT-50 | 608 | LC271327 | 59252486d25b2cee4700182e.KT-50 | 01/07/16 | <i>Acacia spirorbis</i>         | 0 metres    | /inocybe               | 95.00 | KJ778850.1 | Australia       | <i>Acacia</i>                       |
| 256 | KT-50 | 604 | LC271327 | 59252486d25b2cee4700182e.KT-50 | 01/07/16 | <i>Acacia spirorbis</i>         | 0 metres    | /inocybe               | 94.00 | KJ778850.1 | Australia       | <i>Acacia</i>                       |
| 257 | KT-51 | 591 | LC271328 | 59252486d25b2cee4700182e.KT-51 | 01/07/16 | <i>Tristaniopsis calobuxus</i>  | 3 metres    | unknown HELOTIALES     | 97.00 | JX317139.1 | Brazil          | <i>Hoffmannseggella cinnabarina</i> |
| 258 | KT-51 | 581 | LC271328 | 59252486d25b2cee4700182e.KT-51 | 01/07/16 | <i>Tristaniopsis calobuxus</i>  | 1 metres    | unknown HELOTIALES     | 98.00 | JX317139.1 | Brazil          | <i>Hoffmannseggella cinnabarina</i> |
| 259 | KT-52 | 550 | LC271329 | 59252486d25b2cee4700182e.KT-52 | 01/07/16 | <i>Tristaniopsis calobuxus</i>  | 1 metres    | Unknown 1.             | 99.00 | KJ209690.1 | La reunion      | <i>Eucalyptus camaldulensis</i>     |
| 260 | KT-53 | 603 | LC271330 | 59252486d25b2cee4700182e.KT-53 | 15/05/15 | <i>Tristaniopsis calobuxus</i>  | -           | /tomentella-thelephora | 94.76 | HQ829321   | Australia       | -                                   |
| 261 | KT-53 | 595 | LC271330 | 59252486d25b2cee4700182e.KT-53 | 15/05/15 | <i>Tristaniopsis calobuxus</i>  | -           | /tomentella-thelephora | 94.85 | HQ829321   | Australia       | -                                   |
| 262 | KT-55 | 894 | LC271331 | 59252486d25b2cee4700182e.KT-55 | 01/07/16 | <i>Tristaniopsis calobuxus</i>  | 3 metres    | Other unknown          | 83.00 | JQ975954.1 | Spain           | <i>Pinus pinaster</i>               |
| 263 | KT-56 | 773 | LC271332 | 59252486d25b2cee4700182e.KT-56 | 15/05/15 | <i>Tristaniopsis guillainii</i> | > 10 m      | unknown HELOTIALES     | 78.51 | JX317264   | Brazil          | <i>Hoffmannseggella cinnabarina</i> |
| 264 | KT-57 | 755 | LC271333 | 59252486d25b2cee4700182e.KT-57 | 01/07/16 | <i>Tristaniopsis calobuxus</i>  | > 10 metres | /tomentella-thelephora | 99.00 | LC122231.1 | New Caledonia   | <i>Acacia spirorbis</i>             |
| 265 | KT-58 | 717 | LC271334 | 59252486d25b2cee4700182e.KT-58 | 01/07/16 | <i>Acacia spirorbis</i>         | 0 metres    | /inocybe               | 89.00 | FJ904142.1 | Sweden          | -                                   |
| 266 | KT-59 | 703 | LC271335 | 59252486d25b2cee4700182e.KT-59 | 01/07/16 | <i>Tristaniopsis calobuxus</i>  | > 10 metres | unknown RUSSULALES     | 99.00 | JQ405662.1 | Mariana Islands | <i>Pisonia grandis</i>              |
| 267 | KT-59 | 703 | LC271335 | 59252486d25b2cee4700182e.KT-59 | 01/07/16 | <i>Tristaniopsis calobuxus</i>  | > 10 metres | unknown RUSSULALES     | 82.00 | JQ975954.1 | spain           | -                                   |
| 268 | KT-60 | 688 | LC271336 | 59252486d25b2cee4700182e.KT-60 | 01/07/16 | <i>Acacia spirorbis</i>         | 0 metres    | /tomentella-thelephora | 99.00 | LC122169.1 | New Caledonia   | <i>Acacia spirorbis</i>             |

|     |       |     |          |                                |          |                                 |             |                        |       |            |                 |                                  |
|-----|-------|-----|----------|--------------------------------|----------|---------------------------------|-------------|------------------------|-------|------------|-----------------|----------------------------------|
| 269 | KT-61 | 688 | LC271337 | 59252486d25b2cee4700182e.KT-61 | 01/07/16 | <i>Tristaniopsis calobuxus</i>  | > 10 metres | /tomentella-thelephora | 99.00 | LC122155.1 | New Caledonia   | <i>Acacia spirorbis</i>          |
| 270 | KT-62 | 687 | LC271338 | 59252486d25b2cee4700182e.KT-62 | 15/05/15 | <i>Acacia spirorbis</i>         | 0 metres    | /inocybe               | 90.99 | KP013044   | Australia       | -                                |
| 271 | KT-63 | 685 | LC271339 | 59252486d25b2cee4700182e.KT-63 | 01/07/16 | <i>Tristaniopsis calobuxus</i>  | 3 metres    | /tomentella-thelephora | 98.00 | LC122155.1 | New Caledonia   | <i>Acacia spirorbis</i>          |
| 272 | KT-65 | 682 | LC271340 | 59252486d25b2cee4700182e.KT-65 | 01/07/16 | <i>Tristaniopsis calobuxus</i>  | 2 metres    | /tomentella-thelephora | 100   | LC122153.1 | New Caledonia   | <i>Acacia spirorbis</i>          |
| 273 | KT-66 | 680 | LC271341 | 59252486d25b2cee4700182e.KT-66 | 01/07/16 | <i>Acacia spirorbis</i>         | 0 metres    | /tomentella-thelephora | 98.00 | LC122169.1 | New Caledonia   | <i>Acacia spirorbis</i>          |
| 274 | KT-67 | 680 | LC271342 | 59252486d25b2cee4700182e.KT-67 | 01/07/16 | <i>Tristaniopsis calobuxus</i>  | 3 metres    | /tomentella-thelephora | 99.00 | LC122155.1 | New Caledonia   | <i>Acacia spirorbis</i>          |
| 275 | KT-68 | 679 | LC271343 | 59252486d25b2cee4700182e.KT-68 | 01/07/16 | <i>Tristaniopsis calobuxus</i>  | 1 metres    | unknown RUSSULALES     | 97.00 | JQ405662.1 | Mariana Islands | <i>Pisonia grandis</i>           |
| 276 | KT-69 | 676 | LC271344 | 59252486d25b2cee4700182e.KT-69 | 15/05/15 | <i>Acacia spirorbis</i>         | 0 metres    | /tomentella-thelephora | 85.15 | UDB003342  | Australia       | -                                |
| 277 | KT-70 | 674 | LC271345 | 59252486d25b2cee4700182e.KT-70 | 15/05/15 | <i>Acacia spirorbis</i>         | 0 metres    | /tomentella-thelephora | 89.69 | JX630704   | USA             | <i>Dryas integrifolia</i>        |
| 278 | KT-71 | 668 | LC271346 | 59252486d25b2cee4700182e.KT-71 | 01/07/16 | <i>Acacia spirorbis</i>         | 0 metres    | /tomentella-thelephora | 97.00 | LC122169.1 | New Caledonia   | <i>Acacia spirorbis</i>          |
| 279 | KT-72 | 654 | LC271347 | 59252486d25b2cee4700182e.KT-72 | 15/05/15 | <i>Acacia spirorbis</i>         | 0 metres    | Other unknown          | -     | -          | La Reunion      | -                                |
| 280 | KT-73 | 647 | LC271348 | 59252486d25b2cee4700182e.KT-73 | 01/07/16 | <i>Acacia spirorbis</i>         | 0 metres    | /tomentella-thelephora | 90.00 | EU668199.1 | England         | -                                |
| 281 | KT-74 | 640 | LC271349 | 59252486d25b2cee4700182e.KT-74 | 01/07/16 | <i>Acacia spirorbis</i>         | 0 metres    | /tomentella-thelephora | 88.00 | FJ554331.1 | Canada          | -                                |
| 282 | KT-75 | 639 | LC271350 | 59252486d25b2cee4700182e.KT-75 | 01/07/16 | <i>Acacia spirorbis</i>         | 0 metres    | /tomentella-thelephora | 83.00 | AB453032.1 | Thailand        | <i>dipterocarp</i>               |
| 283 | KT-76 | 634 | LC271351 | 59252486d25b2cee4700182e.KT-76 | 15/05/15 | <i>Acacia spirorbis</i>         | 0 metres    | /sebacina              | 98.97 | KP012923   | Australia       | -                                |
| 284 | KT-77 | 632 | LC271352 | 59252486d25b2cee4700182e.KT-77 | 15/05/15 | <i>Tristaniopsis guillainii</i> | > 10 m      | unknown RUSSULALES     | 84.68 | HQ318283   | Australia       | -                                |
| 285 | KT-79 | 617 | LC271353 | 59252486d25b2cee4700182e.KT-79 | 01/07/16 | <i>Acacia spirorbis</i>         | 0 metres    | /inocybe               | 94.00 | KJ778850.1 | Australia       | <i>Acacia</i>                    |
| 286 | KT-81 | 606 | LC271354 | 59252486d25b2cee4700182e.KT-81 | 01/07/16 | <i>Tristaniopsis calobuxus</i>  | > 10 metres | Other unknown          | 99.00 | KX499282.1 | Costa Rica      | <i>Quercus oleoides</i>          |
| 287 | KT-82 | 597 | LC271355 | 59252486d25b2cee4700182e.KT-82 | 15/05/15 | <i>Acacia spirorbis</i>         | 0 metres    | /inocybe               | 99.00 | JX258832   | Australia       | -                                |
| 288 | KT-84 | 592 | LC271356 | 59252486d25b2cee4700182e.KT-84 | 01/07/16 | <i>Acacia spirorbis</i>         | 0 metres    | Other unknown          | 98.00 | FJ613104.1 | Panama          | <i>Cecropia insignis</i>         |
| 289 | KT-85 | 592 | LC271357 | 59252486d25b2cee4700182e.KT-85 | 15/05/15 | <i>Acacia spirorbis</i>         | 0 metres    | /tomentella-thelephora | 90.49 | UDB003341  | Australia       | -                                |
| 290 | KT-87 | 591 | LC271358 | 59252486d25b2cee4700182e.KT-87 | 15/05/15 | <i>Tristaniopsis guillainii</i> | > 10 m      | /russula-lactarius     | 80.78 | HQ318283   | Australia       | -                                |
| 291 | KT-88 | 586 | LC271359 | 59252486d25b2cee4700182e.KT-88 | 01/07/16 | <i>Tristaniopsis calobuxus</i>  | 1 metres    | Other unknown          | 98.00 | DQ398091.1 | USA             | <i>Erythrorchis cassythoides</i> |

|     |        |     |          |                                 |          |                                 |          |                               |       |            |                 |                                     |
|-----|--------|-----|----------|---------------------------------|----------|---------------------------------|----------|-------------------------------|-------|------------|-----------------|-------------------------------------|
| 292 | KT-89  | 584 | LC271360 | 59252486d25b2cee4700182e.KT-89  | 15/05/15 | <i>Tristaniopsis calobuxus</i>  | -        | unknown SEBACINALES           | 94.59 | HQ853684   | China           | <i>Dendrobium chrysanthum</i>       |
| 293 | KT-92  | 577 | LC271361 | 59252486d25b2cee4700182e.KT-92  | 15/05/15 | <i>Acacia spirorbis</i>         | 0 metres | unknown RUSSULALES            | 95.67 | JQ405662   | Mariana Islands | <i>Intsia bijuga</i>                |
| 294 | KT-93  | 561 | LC271362 | 59252486d25b2cee4700182e.KT-93  | 15/05/15 | <i>Acacia spirorbis</i>         | 0 metres | <i>/tomentella-thelephora</i> | 95.19 | UDB017783  | Seychelles      | -                                   |
| 295 | KT-94  | 558 | LC271363 | 59252486d25b2cee4700182e.KT-94  | 15/05/15 | <i>Tristaniopsis guillainii</i> | > 10 m   | <i>/russula-lactarius</i>     | 80.20 | EU598178   | USA             | -                                   |
| 296 | KT-97  | 549 | LC271364 | 59252486d25b2cee4700182e.KT-97  | 01/07/16 | <i>Acacia spirorbis</i>         | 0 metres | unknown THELEPHORALES         | 89.00 | KC986236.1 | Germany         | <i>Bistorta vivipara</i>            |
| 297 | KT-98  | 549 | LC271365 | 59252486d25b2cee4700182e.KT-98  | 01/07/16 | <i>Acacia spirorbis</i>         | 0 metres | <i>/russula-lactarius</i>     | 94.00 | LC122160.1 | New Caledonia   | <i>Acacia spirorbis</i>             |
| 298 | KT-99  | 543 | LC271366 | 59252486d25b2cee4700182e.KT-99  | 15/05/15 | <i>Acacia spirorbis</i>         | 0 metres | <i>/tomentella-thelephora</i> | 93.19 | UDB017783  | Seychelles      | -                                   |
| 299 | KT-102 | 535 | LC271367 | 59252486d25b2cee4700182e.KT-102 | 15/05/15 | <i>Tristaniopsis guillainii</i> | > 10 m   | unknown HELOTIALES            | 97.01 | HM230896   | Ecuador         | <i>Cavendishia bracteata</i>        |
| 300 | KT-103 | 528 | LC271368 | 59252486d25b2cee4700182e.KT-103 | 15/05/15 | <i>Tristaniopsis guillainii</i> | > 10 m   | unknown HELOTIALES            | 99.05 | HM230896   | Ecuador         | <i>Cavendishia bracteata P07A53</i> |
| 301 | KT-106 | 526 | LC271369 | 59252486d25b2cee4700182e.KT-106 | 01/07/16 | <i>Acacia spirorbis</i>         | 0 metres | <i>/inocybe</i>               | 93.00 | KJ778850.1 | Australia       | <i>Acacia</i>                       |
| 302 | KT-108 | 517 | LC271370 | 59252486d25b2cee4700182e.KT-108 | 15/05/15 | <i>Tristaniopsis guillainii</i> | > 10 m   | unknown HELOTIALES            | 98.81 | KP866123   | China           | <i>Pinus elliottii</i>              |
| 303 | KT-109 | 516 | LC271371 | 59252486d25b2cee4700182e.KT-109 | 15/05/15 | <i>Tristaniopsis guillainii</i> | > 10 m   | unknown HELOTIALES            | 94.96 | HM230869   | Ecuador         | <i>Cavendishia bracteata P07A30</i> |
| 304 | KT-112 | 514 | LC271372 | 59252486d25b2cee4700182e.KT-112 | 15/05/15 | <i>Tristaniopsis calobuxus</i>  | -        | <i>/tomentella-thelephora</i> | 93.58 | UDB017783  | Seychelles      | -                                   |
| 305 | KT-114 | 499 | LC271373 | 59252486d25b2cee4700182e.KT-114 | 15/05/15 | <i>Acacia spirorbis</i>         | 0 metres | <i>/tomentella-thelephora</i> | 88.86 | UDB016392  | Estonia         | -                                   |
| 306 | KT-115 | 498 | LC271374 | 59252486d25b2cee4700182e.KT-115 | 15/05/15 | <i>Tristaniopsis calobuxus</i>  | -        | unknown HELOTIALES            | 96.07 | FJ197200   | USA             | -                                   |
| 307 | KT-119 | 475 | LC271375 | 59252486d25b2cee4700182e.KT-119 | 15/05/15 | <i>Acacia spirorbis</i>         | 0 metres | <i>/inocybe</i>               | 91.77 | KJ778850   | Australia       | -                                   |
| 308 | KT-123 | 445 | LC271376 | 59252486d25b2cee4700182e.KT-123 | 15/05/15 | <i>Tristaniopsis guillainii</i> | > 10 m   | <i>/boletus</i>               | 77.63 | JN903703   | China           | -                                   |
| 309 | KT-124 | 433 | LC271377 | 59252486d25b2cee4700182e.KT-124 | 15/05/15 | <i>Tristaniopsis guillainii</i> | > 10 m   | unknown HELOTIALES            | 92.56 | JX317264   | Brazil          | <i>Hoffmannseggella cinnabarina</i> |
| 310 | KT-125 | 430 | LC271378 | 59252486d25b2cee4700182e.KT-125 | 15/05/15 | <i>Tristaniopsis guillainii</i> | > 10 m   | <i>/russula-lactarius</i>     | 82.68 | UDB013459  | Australia       | -                                   |
| 311 | KT-127 | 409 | LC271379 | 59252486d25b2cee4700182e.KT-127 | 15/05/15 | <i>Tristaniopsis calobuxus</i>  | -        | unknown HELOTIALES            | 88.83 | FJ197200   | USA             | -                                   |
| 312 | KT-128 | 403 | LC271380 | 59252486d25b2cee4700182e.KT-128 | 15/05/15 | <i>Tristaniopsis calobuxus</i>  | -        | unknown HELOTIALES            | 96.02 | FJ197200   | USA             | -                                   |

**Table S6:** Results of Chi square tests multiple comparisons of ectomycorrhizal Lineages. Several data pools were made, to know if the Lineage community differs in relation to multiple factors: A) host specificity (AS = *Acacia spirorbis*; TG = *Tristaniopsis guillainii*; TC = *T. calobuxus*), B) the year of sampling (2015 versus 2016), C) the distance of sampling from AS, expressed in meters (the “none” level corresponds to TG grown in nursery), and D) the combinations of all factors mentioned above (host + year + distance). For each table, the results reports both the Chi square values (bottom left part of the table) and their respective significativities (top right part of the table), where NS is  $P > 0.05$ ; \* is  $P < 0.05$ ; \*\* is  $P < 0.01$ ; \*\*\* is  $P < 0.001$ .

| A) Host | AS | TC  | TG  |
|---------|----|-----|-----|
| AS      |    | *** | *** |
| TC      | 47 |     | *** |
| TG      | 63 | 47  |     |

| B) Year | 2015 | 2016 |
|---------|------|------|
| 2015    |      | *    |
| 2016    | 22   |      |

| C) Distance | none | 0 m | 1 m | 2 m | 3 m | 10 m |
|-------------|------|-----|-----|-----|-----|------|
| none        |      | *** | **  | *   | *   | ***  |
| 0 m         | 37   |     | *** | NS  | **  | ***  |
| 1 m         | 12   | 33  |     | NS  | **  | *    |
| 2 m         | 9    | 7   | 6   |     | NS  | **   |
| 3 m         | 6    | 19  | 15  | 7   |     | ***  |
| 10 m        | 41   | 68  | 15  | 19  | 31  |      |

| D) Treatments | AS_2015_0m | AS_2016_0m | TC_2015_none | TC_2016_1m | TC_2016_2m | TC_2016_3m | TC_2016_10m | TG_2015_10m |
|---------------|------------|------------|--------------|------------|------------|------------|-------------|-------------|
| AS_2015_0m    |            | *          | ***          | **         | NS         | NS         | ***         | ***         |
| AS_2016_0m    | 13         |            | ***          | ***        | *          | *          | ***         | ***         |
| TC_2015_none  | 28         | 21         |              | **         | *          | *          | ***         | ***         |
| TC_2016_1m    | 21         | 27         | 12           |            | NS         | **         | NS          | **          |
| TC_2016_2m    | 4          | 12         | 9            | 6          |            | NS         | *           | ***         |
| TC_2016_3m    | 13         | 13         | 6            | 15         | 7          |            | **          | ***         |
| TC_2016_10m   | 33         | 36         | 24           | 9          | 11         | 17         |             | ***         |
| TG_2015_10m   | 43         | 44         | 34           | 20         | 24         | 32         | 25          |             |
